1  
2  
3  
4  
5  
6  
7  
8  
9  
10  
11  
12  
13  
14  
15  
16  
17  
18  
19  
20  
21

# High-Throughput Controlled Mechanical Stimulation and Functional Imaging *In Vivo*

Yongmin Cho<sup>1\*</sup>, Daniel A. Porto<sup>2\*</sup>, Hyundoo Hwang<sup>1</sup>, Laura J. Grundy<sup>3</sup>,  
William R. Schafer<sup>3</sup>, Hang Lu<sup>1,2</sup>

<sup>1</sup>School of Chemical & Biomolecular Engineering, Georgia Institute of Technology, USA

<sup>2</sup>Interdisciplinary Bioengineering Program, Georgia Institute of Technology, USA

<sup>3</sup>Medical Research Council Laboratory of Molecular Biology, Cambridge, UK

\*These authors contributed equally to this work.

Correspondence should be addressed to HL: [hang.lu@gatech.edu](mailto:hang.lu@gatech.edu), 1-404-894-8473

22 **Abstract:**

23

24 Understanding mechanosensation and other sensory behavior in genetic model systems such as  
25 *C. elegans* is relevant to many human diseases. These studies conventionally require  
26 immobilization by glue and manual delivery of stimuli, leading to low experimental throughput  
27 and high variability. Here we present a microfluidic platform that delivers precise mechanical  
28 stimuli robustly. The system can be easily used in conjunction with functional imaging and  
29 optical interrogation techniques, as well as other capabilities such as sorting or more  
30 sophisticated fluid delivery schemes. The platform is fully automated, thereby greatly enhancing  
31 the throughput and robustness of experiments. We show that behavior of the well-known gentle  
32 and harsh touch neurons and their receptive fields can be recapitulated in our system. Using  
33 calcium dynamics as a readout, we demonstrate the ability to perform a drug screen *in vivo*.  
34 Furthermore, using an integrated chip platform that can deliver both mechanical and chemical  
35 stimuli, we examine sensory integration in interneurons in response to multimodal sensory  
36 inputs. We envision that this system will be able to greatly accelerate the discovery of genes and  
37 molecules involved in mechanosensation and multimodal sensory behavior, as well as the  
38 discovery of therapeutics for related diseases.

39

## 40 Introduction

41 Mechanosensation is required for multiple sensory modalities such as touch, hearing, and  
42 balance, and is linked to a multitude of disorders including deafness<sup>1-4</sup>. Molecular mechanisms  
43 for mechanotransduction have been partially elucidated using a variety of model organisms,  
44 including *Caenorhabditis elegans*<sup>5-16</sup>. Conventional mechanosensation experiments with *C.*  
45 *elegans* typically involve the manual delivery of a mechanical stimulus to anterior or posterior  
46 regions of animals via an eyebrow hair or metal pick<sup>5,17-19</sup>, and visual scoring of touch avoidance  
47 behavior, an assay subject to considerable variability between experimenters. Computer-  
48 controlled stimulation methods, for example using a piezo-driven micro stylus, have been used  
49 with electrophysiological and functional imaging approaches to deliver more repeatable  
50 mechanical stimuli to animals<sup>20,21</sup>. However, recording of neuronal responses by patch clamping  
51 or calcium imaging in response to precisely controlled mechanical stimulation requires animals  
52 to be immobilized with glue<sup>15,20,21</sup>, limiting experimental throughput and disallowing the  
53 recovery of animals for screens or further experimentation. Moreover, gluing itself is likely to  
54 affect neuronal or circuit response, and differences in the extent of gluing introduce additional  
55 experimental variability.

56  
57 Microfluidics has long been used as a “lab-on-a-chip” technology, allowing for well-  
58 controlled and high-throughput experiments with small samples<sup>22</sup>. In addition to enabling precise  
59 perturbations on the micron scale, microfluidic devices can easily be designed to work together  
60 with optical microscopy, allowing for imaging of fluorescent probes such as calcium indicators.  
61 For *C. elegans* experimentation particularly, microfluidics has been a widely adopted technology  
62 due to the match in length scale and compatibility with fluid handling<sup>23</sup>. Various devices have  
63 been developed for delivering a variety of stimuli, including chemical cues and temperature  
64 gradients, while simultaneously recording neuronal responses through calcium imaging<sup>24-33</sup>. In  
65 contrast, there are currently no microfluidic devices capable of delivering mechanical stimuli to  
66 *C. elegans*, or do so while recording neuronal activities in a controlled manner. In this work we  
67 present a microfluidic platform for delivering robust and precise mechanical stimuli to *C.*  
68 *elegans* by using pneumatically actuated structures. The device is fully automated, minimizing  
69 human variability and improving experimental throughput; it is fully compatible with fluorescent  
70 imaging of calcium dynamics of neurons, which enables mechanistic interrogations as well as

71 high-throughput genetic or drug screens. Furthermore, the mechanical stimulus module of the  
72 device can be easily integrated with other microfluidic modalities, allowing for multimodal  
73 stimulation for sensory integration studies. Here we demonstrate the design and utility of such a  
74 system in the context of high-throughput screening, as well as interrogate circuit dynamics in  
75 multimodal sensory behavior.

76

## 77 **Results**

78 Our microfluidic device is optimized to deliver precise and repeatable mechanical stimuli to  
79 different anatomical regions of *C. elegans* (Fig. 1). After animals are loaded into an imaging  
80 channel (where the animals are not immobilized but their movement is much reduced from freely  
81 moving behavior), mechanical stimuli are delivered through two pairs of in-plane PDMS  
82 membrane structures (Fig. 1a and Supplementary Fig. 1). The structures are pressure-actuated,  
83 and when deflected, exert a mechanical stimulus on animals trapped in the imaging channel. The  
84 deflection and deformation caused by these actuations are in similar ranges as conventional  
85 approaches (Supplementary Fig. 2)<sup>20,21</sup>. Two additional actuated structures act as loading and  
86 imaging valves (Fig. 1a). This design retains animals in plane and relatively stationary but not  
87 fully immobilized, thus allowing high-quality imaging of calcium transients in cell bodies and  
88 subcellular processes (Fig. 1b). To automatically identify the fluorescently labeled neuron of  
89 interest and extract quantitative calcium transients, we developed a neuron tracking algorithm  
90 (Supplementary Fig. 3). The actuated structures are connected to a pressure source via  
91 individually controlled off-chip solenoid valves, allowing for an automated and rapid “load-and-  
92 image” routine (Fig. 1c). Additionally, the duration and pressure of stimuli can be easily  
93 controlled, allowing for the study of a variety of behaviors upon mechanical stimuli such as  
94 graded response, habituation, and arousal. Furthermore, this design can be easily adapted to  
95 allow for sorting and imaging animals of various sizes.

96

97 To demonstrate the utility of the system, we examined the responses of the classic gentle  
98 (AVM, ALMR/L, PVM, and PLMR/L) and harsh (PVD) touch receptor neurons<sup>19</sup> (Fig. 1d). The  
99 stimulus is traditionally delivered to moving worms by a metal pick<sup>19</sup>, or to immobilized worms  
100 by a stiff probe<sup>15,20</sup>. By imaging calcium transients in animals expressing the genetically encoded  
101 calcium indicator (GECI) GCaMP6m<sup>34</sup> in these touch receptor neurons, we show that the same

102 device can deliver stimuli capable of exciting both the gentle and harsh touch neurons. Upon  
103 delivery of either a 1- or 2-second stimulus, calcium levels in cell bodies as well as in neuronal  
104 processes of both the gentle and harsh touch neurons rose as expected (Fig. 1e-m and  
105 Supplementary Movie 1-4). Spatially, these responses were consistent with the individual  
106 neurons' receptive fields as defined by anatomical and/or calcium imaging data<sup>5,18,20,35</sup>. AVM  
107 responded to anterior but not posterior stimuli (Fig. 1k). In contrast, PVD responded to both  
108 anterior and posterior stimuli, as did PVM, with the responses to posterior stimuli being stronger  
109 for both of these classes of neurons (Fig. 1l, m). These results demonstrate that the  
110 mechanosensory chip delivers biologically relevant, spatially well-defined stimuli.

111  
112 Because our system delivers mechanical stimuli by applying externally controlled pressure to  
113 actuated structures, the stimuli can be regulated by the magnitude and duration of the applied  
114 pressure (Fig. 2 and Supplementary Fig. 2). In the range of stimuli of relevance, the deformation  
115 in the animal tissue is roughly linear to the actuation pressure (Supplementary Fig. 2). To  
116 examine the effects of these two parameters, we applied anterior stimuli of varying levels of  
117 pressure and durations, and measured calcium activity in AVM neurons (Fig. 2a-d and  
118 Supplementary Fig. 4a, 5). Peak calcium transients were roughly proportional to the pressure  
119 applied (Fig. 2a, c) and the stimulus duration (Fig. 2b, d and Supplementary Fig. 4, 5). We also  
120 tested AVM's responses in the well-known *mec-4*/DEG/ENaC channel mutant (Fig. 2e). As  
121 expected, the *mec-4* mutant gives negligible response and is insensitive to the magnitude of the  
122 stimulation input in the gentle touch regime, but is responsive to harsh touch, perhaps even more  
123 so than wild-type (Fig. 2e,f). Similarly, in the harsh touch regime, we presented posterior stimuli  
124 of varying pressure and durations, and observed responses in PVD neurons (Fig. 2g, h). As  
125 expected, compared to gentle touch neurons, PVD required higher pressure (55 psi) or longer  
126 duration of stimulus (5s) at low pressure to elicit similar responses. Furthermore, PVD also  
127 shows graded response to pressure and duration (Fig. 2g, h and Supplementary Fig. 4b).

128  
129 Interestingly, in addition to response magnitude, the response rates of both the gentle touch  
130 and the harsh touch neurons are also functions of the stimulation pressure and duration (Fig. 2i).  
131 For AVM, stimuli with actuation pressure higher than 40 psi produce a response rate (fraction of  
132 animals responding) of >90%, while below 30 psi the response is more stochastic (<20%) (Fig.

133 2i and Supplementary Fig. 4-6). Applying stimuli at lower actuation pressure also elicits a less  
134 sustained response or small magnitude of response and shorter stimuli elicits less response.

135  
136 Besides simple stimulation, our system can also be used to deliver repeated stimuli in order  
137 to examine phenomena such as habituation and desensitization. Previous work has shown that  
138 presenting repeated mechanical stimuli can cause habituation in mechanosensory neurons<sup>20</sup>. To  
139 ask whether this phenomenon can be recapitulated in our system, we delivered repeated stimuli  
140 to animals using either short (1s) or long (3 min) inter-stimulus intervals (Fig. 2j-m and  
141 Supplementary Fig. 7). When receiving repeated stimuli with short intervals, the neurons  
142 exhibited an incremental increase in response magnitude up to the second stimuli, and then a  
143 reduced response in later stimuli (Fig. 2j, l). In contrast, when using long inter-stimulus intervals,  
144 the response magnitude was reduced after each stimulus (Fig. 2k, m). These results are consistent  
145 with previous observations that habituation is dependent on inter-stimulus durations<sup>20</sup>. Thus,  
146 these experiments demonstrate how simple changes of operational parameters allow us to use the  
147 same device for a wider repertoire of the device utility.

148  
149 In contrast to gluing protocols, our system allows for automated imaging by streamlining the  
150 handling of the worms; this in turn allows for high-throughput experiments that were not  
151 practicable before. To demonstrate the ability to perform rapid screens, we examined the effect  
152 of small molecules from an orphan ligand library on mechanosensation. We exposed animals to  
153 the compounds in L4 stage, and imaged AVM activity when delivering an anterior stimulus to  
154 adult worms (Fig. 3a). Figure 3b shows a typical response of wildtype animals without drug  
155 perturbation: calcium traces typically reach a maximum value shortly after the end of stimulus,  
156 and then slowly decline back to baseline levels. In order to examine how each drug affects  
157 mechanosensation, we quantitatively compared three metrics (max  $\Delta R/R_0$ , delay time, and half-  
158 life), as well as fraction of animals responding, between drug-treated animals and untreated  
159 animals (Fig. 3c-h and Supplementary Fig. 8, 9). We imaged adult animals exposed to 13  
160 different drugs and quantified the established parameters for the screen criteria (Supplementary  
161 Table 1). While most of the drugs screened lowered the number of animals responding to  
162 mechanical stimulus, interestingly, a few drugs slightly increased the response fraction (Fig. 3c).  
163 We also analyzed differences in the metrics measure calcium dynamics for the drug treatment

164 conditions, and found that five of the drugs we tested significantly affected mechanosensation  
165 response dynamics (Fig. 3d-f). Specifically, D-Alanine (#5) and D-Arginine (#8) significantly  
166 attenuated the max  $\Delta R/R_0$  while increasing the delay in the responses (Fig. 3d, e, h). In contrast,  
167 D-Lysine (#4) only attenuated the max response (Fig. 3d, g). Two other drugs had effects only in  
168 the decay-time of response (Fig. 3f-h). D-Isoleucine (#3) induced considerably smaller half-life  
169 for the calcium transients to return to baseline, much faster than in untreated animals (Fig. 3f, g).  
170 Lastly,  $\beta$ -Alanine (#6) significantly increased the half-life, and calcium transients decreased in a  
171 slow linear gradient, instead of a typical exponential decay (Fig. 3f, h).

172

173 Another advantage of using microfluidics to deliver mechanosensory stimuli is that it is  
174 compatible with other microfluidic components to provoke additional sensory responses, e.g.  
175 chemosensation<sup>25</sup>. *C. elegans* is a convenient system for studying multimodal sensory integration  
176 *in vivo*; worms have distinct sensory modalities such as mechanosensation and chemosensation,  
177 which allow them to find food sources and estimate danger. The difficulty to study sensory  
178 integration thus far is that there has not been a convenient method to integrate mechanosensory  
179 input with the existing tools, including microfluidic and optical methods<sup>23,25,36-38</sup>. With our  
180 mechanical stimulus device, incorporating chemosensory modules is readily attainable by simply  
181 adding channels to deliver chemical stimuli (Supplementary Fig. 10); without mechanical  
182 stimulation, the response of a chemosensory neuron to a chemical cue is as expected  
183 (Supplementary Fig. 11). To demonstrate the utility of the system for multimodal sensory  
184 integration, we focused on the response of the PVC command interneurons to both mechanical  
185 and chemical stimuli. PVC interneurons are postsynaptic to both the posterior mechanoreceptor  
186 neurons PLML/R, as well as the posterior chemosensory neurons PHBL/R, that have been shown  
187 to respond to 0.1% SDS stimulus<sup>5,39-41</sup> (Fig. 4a and Supplementary Fig. 12a). Using our device to  
188 deliver multi-modal stimuli, we tested the ability of PVC to respond to stimuli within the same  
189 mode and cross-modality. When a single sub-threshold stimulus in either modality is delivered  
190 (i.e. 30s SDS stimulation to the tail, or 1s mechanical stimulation to the tail), PVC shows a low  
191 probability of response (Fig. 4b, c). Compared to upstream sensory neurons, PVC also responds  
192 with a lower magnitude and the response is more variable (Fig. 4b, c and Supplementary Fig.  
193 12b, c). Perhaps not so surprisingly, PVC's response to subthreshold stimuli in the same  
194 modality can be sensitized for subsequent stimulation (Supplementary Fig. 12d). More

195 interestingly, when pre-sensitized by cross-modality sub-threshold stimuli (i.e. chemical before  
196 mechanical stimulus, or vice versa), PVC shows similar sensitized responses (Fig. 4d, e, and  
197 Supplementary Movie 5, 6). This sensitization is seen both in terms of the magnitude of the  
198 individual responses and the fraction of responding animals.

199

200

## 201 **Discussion**

202 For fundamental studies of mechanosensation, quantitative live imaging is necessary, and to  
203 perform screens based on mechanosensory phenotypes requires large sample sizes. Our  
204 microfluidic platform allows for studying mechanosensation in *C. elegans* quantitatively and  
205 conveniently, allowing for the delivery of a variety of types of mechanical stimuli to live animals  
206 while recording neuronal activity. Experimental preparation (mainly washing) can be  
207 accomplished for a batch of animals, so the limiting step is imaging (tens of seconds to minutes  
208 depending on the experiments). Experimental throughput using our streamlined microfluidic  
209 system can be as high as ~100 trials per hour; it is also straightforward to automate and run these  
210 systems in parallel to further improve throughput. In contrast, the conventional approach (gluing  
211 worms and stimulating with a micro stylus and micromanipulator) generally yields  
212 ~10 successful trials per day. The integration of hardware and software also allows for automated  
213 operations of imaging, stimulation, and quantitative analysis, further reducing potential human  
214 error and bias. This important improvement in throughput and standardization over conventional  
215 methods allowed us to conduct a novel drug screen based on neuronal dynamics due to  
216 mechanical stimuli. By using our system, we identified several candidates that strongly affect  
217 dynamics in mechanosensory neurons in a variety of ways. One can envision genetic screens  
218 performed in a similar manner to identify mechanosensory mutants. Many worm  
219 mechanosensory modalities, such as harsh touch and nose touch, involve multiple partially-  
220 redundant cell types, making behavioral assays ineffective for finding genes affecting these  
221 processes. With simple integration of sorting mechanisms on chip<sup>36,42,43</sup>, it will be possible to  
222 conduct high-throughput forward screens for mutants affecting the responses of individual  
223 neurons, using a GECI-based assay. The genes identified in such screens should provide insight  
224 into the underlying mechanisms of mechanosensation, as well as find potential therapies for  
225 sensory-loss conditions such as deafness.



226

227        Additionally, microfluidic incorporation of fluidic control can easily allow interrogation of  
228 other sensory modalities (e.g. olfaction) in combination with mechanosensation. We have shown  
229 that our platform is compatible with previous techniques for delivering chemical stimuli,  
230 enabling for the interrogation of integration of multimodal stimuli in the interneurons. This  
231 feature can greatly expand the repertoire of assay conditions to allow studies of sensory  
232 integration, arousal, habituation, and sensitization. For example, it has been previously shown  
233 that neural responses to sensory stimuli become more deterministic as information flows from  
234 sensory neurons to interneurons; behavioral responses, however, correlate more strongly with  
235 interneurons such as PVC<sup>33,44</sup>. We show here that PVC's response can be modulated, by prior  
236 sensory inputs, and that this modulation is cross-modal. This may point to an interesting  
237 ecologically relevant strategy for animal behavior, such that the reliability of the escape response  
238 depends both on the stimulus and on the current state of the circuit, as influenced by experience.

239

240        Because our platform employs a simple microfluidic device, it is easily adaptable to study  
241 biological systems of various sizes. Scaling the devices to be smaller can allow studies of  
242 mechanosensory neurons in worm larvae during development; scaling the devices larger can  
243 allow studies of the mechanosensation circuit during aging in *C. elegans*, as well as neurons and  
244 circuits in other model organisms such as zebrafish or fly larvae. Lastly, because the microfluidic  
245 chip allows unhindered optical access, integrations of optogenetic methods<sup>37,38,45-49</sup> can also be  
246 straightforwardly carried out in this platform, thereby greatly expanding the repertoire of  
247 biological problems to be studied.

248

249

#### 250 **Acknowledgments:**

251        The authors would like to thank K. Shen (HHMI/Stanford) and D. Kim (HHMI Janelia  
252 Research Campus) for sharing reagents; GCaMP6 transgene constructs were provided by the  
253 Genetically-Encoded Neuronal Indicator and Effector Project, Janelia Research Campus,  
254 Howard Hughes Medical Institute. This work was supported in part by the U.S. NIH  
255 (R01GM088333 and R01NS096581 to HL), the Wellcome Trust (WT103784MA to WRS), and  
256 the MRC (MC-A022-5PB91 to WRS). Some nematode strains used in this work were provided

257 by the Caenorhabditis Genetic Center, which is funded by the NIH, National Center for Research  
258 Resources and the International *C. elegans* Knockout Consortium.

## 259 **Methods:**

### 260 Strains

261 *C. elegans* were maintained under standard conditions and fed OP50 bacteria<sup>50</sup>. The  
262 following strains were used in this study:

263 AQ 3236 *ljIs142[mec-4::GCaMP6m::SL2TagRFP, unc-119] II; unc-119(ed3) III*

264 TV17924 *wyls5007[ser2prom3::GCaMP6, egl-17::mCherry] X*

265 CX10979 *kyEx2865[sra-6::GCaMP3, Pofm-1::GFP]*

266 GT243 *aEx2[pglr-1::GCaMP6(s), punc-122::GFP]*

267 RW1596 *stEx30[myo-3p::GFP + rol-6(su1006)]*

268 To construct AQ3236, we used a single-copy insertion vector containing a GCaMP6M transgene  
269 codon-optimized for *C. elegans*, under the control of the *mec-4* promoter (a gift from Doug Kim  
270 at HMMI Janelia Research Campus). Single-copy chromosomal integrations were obtained using  
271 the MosTic procedure<sup>51</sup>. Unless otherwise specified, all worms imaged in this study are adults.

272

### 273 Chip Design and Fabrication

274 The device consists of worm inlet/outlet, imaging channel (50~60  $\mu\text{m}$  deep), and four  
275 sets of actuated PDMS membranes. Animals loosely fit in the channel, and are trapped (but not  
276 held) in the imaging area by two sets of actuated members. The width of actuated PDMS  
277 membrane is 150  $\mu\text{m}$ , the distance between first and second sets of membrane is 200  $\mu\text{m}$  and  
278 second and third sets of membrane is 250  $\mu\text{m}$ .

279 Since worms were not immobilized using drugs, animals' head or tail can move in the  
280 imaging channel of the microfluidic chip. This movement sometimes blurs images. To reduce the  
281 movement of head or tail part of worms, a three-step vertical tapering of the imaging channel  
282 was used to restrict the out-of-plane movement. The thickness of first and second layers was 15  
283  $\mu\text{m}$  and third layer was 20  $\mu\text{m}$  for the 50  $\mu\text{m}$  deep imaging channel; these layers were created by  
284 SU-8 2015 negative photoresist (MicroChem) using standard photolithographic techniques<sup>52</sup>.

285 To create the actuated PDMS structure to touch and trap worms, multi-layer soft  
286 lithography process<sup>53</sup> was used. For the bottom flow layer of features, 23:1 PDMS was deposited  
287 via spin coating to create a thin layer. For the top control layer, 10:1 PDMS was directly poured

288 onto a blank master, which does not have any features, to create a thick and mechanically rigid  
289 handle layer. Both layers were then placed into a 90°C oven for 25-30 minutes until the control  
290 layer PDMS was rigid but sticky. After they were manually aligned, additional 10:1 PDMS was  
291 poured and cured for several hours to create a rigid handling layer for the device.

292

293

## 294 Calcium Imaging

295 All imaging experiments were performed on a Leica DMIRB inverted microscope using a  
296 40x air objective (N.A. 0.75). Video sequences were captured using a Hamamatsu EM-CCD  
297 camera with 100 ms exposure time. Simultaneous two-color imaging was performed using a  
298 DV2 beamsplitter (Photometrics) containing a GFP/RFP filter set. Excitation light for fluorescent  
299 imaging was delivered through a projector system previously developed<sup>38</sup>. In experiments for the  
300 measurement of mechanosensory neuronal responses, stimuli were delivered 10 s after recording  
301 baseline activity of neurons. In experiment for the measurement of interneuronal recording,  
302 stimuli were delivered 30 s after recording baseline activity of neurons. Videos were recorded for  
303 60-180 s following stimulus delivery.

304

305

## 306 Data Analysis

307 Fluorescence intensities for each frame were extracted using customized neuron-tracking  
308 Matlab scripts (Supplementary Fig. 7). In strains where both GCaMP6 and RFP are expressed,  
309 the ratio between intensity values were computed ( $R = \frac{I_{G\_ROI}}{I_{R\_ROI}}$ ) in order to minimize movement  
310 artifacts. When only GCaMP was available, fluorescence values were computed by subtracting  
311 background intensity ( $F = I_{G\_ROI} - I_{G\_Back}$ ). GCaMP and RFP intensities were measured as the  
312 mean pixel intensity of the 100 brightest pixels of a circular region of interest (ROI) of 10 pixel  
313 radius. Background intensities were subtracted to adjust for variations in lighting conditions, and  
314 were measured as the mean pixel intensity of an ROI in a background region (Supplementary  
315 Fig. 7). Calcium traces were computed as the change in R or F from the baseline value ( $\frac{\Delta R}{R_o} =$   
316  $\frac{R-R_o}{R_o}$ ) or ( $\frac{\Delta F}{F_o} = \frac{F-F_o}{F_o}$ ). Baseline values were computed as the mean R or F prior to stimulus  
317 delivery.

318

319 Drug screening

320 Worms were roughly synchronized by picking 20-25 L4 worms and allowing them to lay  
321 eggs overnight before removing them from the plate. After two days at 20°C, tightly age-  
322 synchronized populations of worms were obtained by washing adults and L1s off of these plates  
323 and then washing newly hatched L1s from these plates after an hour interval. The 84 compounds  
324 of the Screen-Well Orphan library (ENZO) were used for the drug screening. 20-30 tightly-  
325 synchronized L4 worms were placed on a 48-well plate (Greiner Bio-One) with 0.5 ml OP50  
326 bacteria (OD 5) for non-treated worms and both 0.495 ml OP50 bacteria and 0.005 ml (100 µM)  
327 drugs for drug-treated worms. After 24 hours, worms were imaged. Among 84 compounds in the  
328 library, we tested the effect of 13 compounds on AVM neuronal responses at three different ages  
329 (from day 1 adult to day 3 adult). These compounds were chosen randomly from the orphan  
330 ligand library.

## 331 References

- 332 1 Corey, D. P. New TRP channels in hearing and mechanosensation. *Neuron* **39**, 585-588 (2003).
- 333 2 Kung, C. A possible unifying principle for mechanosensation. *Nature* **436**, 647-654 (2005).
- 334 3 Nicolson, T. The genetics of hearing and balance in zebrafish. *Annu. Rev. Genet.* **39**, 9-22 (2005).
- 335 4 Lumpkin, E. A. & Caterina, M. J. Mechanisms of sensory transduction in the skin. *Nature* **445**,
- 336 858-865 (2007).
- 337 5 Chalfie, M. *et al.* The neural circuit for touch sensitivity in *Caenorhabditis elegans*. *The Journal of*
- 338 *neuroscience* **5**, 956-964 (1985).
- 339 6 Chalfie, M. & Au, M. Genetic control of differentiation of the *Caenorhabditis elegans* touch
- 340 receptor neurons. *Science* **243**, 1027-1033 (1989).
- 341 7 Hong, K. & Driscoll, M. A transmembrane domain of the putative channel subunit MEC-4
- 342 influences mechanotransduction and neurodegeneration in *C. elegans*. (1994).
- 343 8 Huang, M. & Chalfie, M. Gene interactions affecting mechanosensory transduction in
- 344 *Caenorhabditis elegans*. *Nature* **367**, 467-470 (1994).
- 345 9 Corey, D. P. & Garcia-Anoveros, J. Mechanosensation and the DEG/ENaC ion channels. *Science*
- 346 **273**, 323 (1996).
- 347 10 Tavernarakis, N., Shreffler, W., Wang, S. & Driscoll, M. *unc-8*, a DEG/ENaC family member,
- 348 encodes a subunit of a candidate mechanically gated channel that modulates *C. elegans*
- 349 locomotion. *Neuron* **18**, 107-119 (1997).
- 350 11 Tobin, D. M. *et al.* Combinatorial expression of TRPV channel proteins defines their sensory
- 351 functions and subcellular localization in *C. elegans* neurons. *Neuron* **35**, 307-318 (2002).
- 352 12 Goodman, M. B. *et al.* MEC-2 regulates *C. elegans* DEG/ENaC channels needed for
- 353 mechanosensation. *Nature* **415**, 1039-1042 (2002).
- 354 13 O'Hagan, R., Chalfie, M. & Goodman, M. B. The MEC-4 DEG/ENaC channel of *Caenorhabditis*
- 355 *elegans* touch receptor neurons transduces mechanical signals. *Nature neuroscience* **8**, 43-50
- 356 (2005).
- 357 14 Kindt, K. S. *et al.* *Caenorhabditis elegans* TRPA-1 functions in mechanosensation. *Nature*
- 358 *neuroscience* **10**, 568-577 (2007).
- 359 15 Chatzigeorgiou, M. *et al.* Specific roles for DEG/ENaC and TRP channels in touch and
- 360 thermosensation in *C. elegans* nociceptors. *Nature neuroscience* **13**, 861-868 (2010).
- 361 16 Delmas, P. & Coste, B. Mechano-gated ion channels in sensory systems. *Cell* **155**, 278-284
- 362 (2013).
- 363 17 Sulston, J., Dew, M. & Brenner, S. Dopaminergic neurons in the nematode *Caenorhabditis*
- 364 *elegans*. *Journal of Comparative Neurology* **163**, 215-226 (1975).
- 365 18 Chalfie, M. & Sulston, J. Developmental genetics of the mechanosensory neurons of
- 366 *Caenorhabditis elegans*. *Developmental biology* **82**, 358-370 (1981).
- 367 19 Way, J. C. & Chalfie, M. The *mec-3* gene of *Caenorhabditis elegans* requires its own product for
- 368 maintained expression and is expressed in three neuronal cell types. *Genes & development* **3**,
- 369 1823-1833 (1989).
- 370 20 Suzuki, H. *et al.* In vivo imaging of *C. elegans* mechanosensory neurons demonstrates a specific
- 371 role for the MEC-4 channel in the process of gentle touch sensation. *Neuron* **39**, 1005-1017
- 372 (2003).
- 373 21 Eastwood, A. L. *et al.* Tissue mechanics govern the rapidly adapting and symmetrical response to
- 374 touch. *Proceedings of the National Academy of Sciences* **112**, E6955-E6963 (2015).
- 375 22 Whitesides, G. M. The origins and the future of microfluidics. *Nature* **442**, 368-373 (2006).
- 376 23 San-Miguel, A. & Lu, H. Microfluidics as a tool for *C. elegans* research. (2005).
- 377 24 Ryu, W. S. & Samuel, A. D. Thermotaxis in *Caenorhabditis elegans* analyzed by measuring
- 378 responses to defined thermal stimuli. *The Journal of neuroscience* **22**, 5727-5733 (2002).

- 379 25 Chronis, N., Zimmer, M. & Bargmann, C. I. Microfluidics for in vivo imaging of neuronal and  
380 behavioral activity in *Caenorhabditis elegans*. *Nature methods* **4**, 727-731 (2007).
- 381 26 Chalasani, S. H. *et al.* Dissecting a circuit for olfactory behaviour in *Caenorhabditis elegans*.  
382 *Nature* **450**, 63-70 (2007).
- 383 27 Kuhara, A. *et al.* Temperature sensing by an olfactory neuron in a circuit controlling behavior of  
384 *C. elegans*. *Science* **320**, 803-807 (2008).
- 385 28 Guo, Z. V., Hart, A. C. & Ramanathan, S. Optical interrogation of neural circuits in *Caenorhabditis*  
386 *elegans*. *Nature methods* **6**, 891-896 (2009).
- 387 29 Macosko, E. Z. *et al.* A hub-and-spoke circuit drives pheromone attraction and social behaviour  
388 in *C. elegans*. *Nature* **458**, 1171-1175 (2009).
- 389 30 Ha, H.-i. *et al.* Functional organization of a neural network for aversive olfactory learning in  
390 *Caenorhabditis elegans*. *Neuron* **68**, 1173-1186 (2010).
- 391 31 Albrecht, D. R. & Bargmann, C. I. High-content behavioral analysis of *Caenorhabditis elegans* in  
392 precise spatiotemporal chemical environments. *Nature methods* **8**, 599-605 (2011).
- 393 32 Kato, S., Xu, Y., Cho, C. E., Abbott, L. & Bargmann, C. I. Temporal responses of *C. elegans*  
394 chemosensory neurons are preserved in behavioral dynamics. *Neuron* **81**, 616-628 (2014).
- 395 33 Luo, L. *et al.* Dynamic encoding of perception, memory, and movement in a *C. elegans*  
396 chemotaxis circuit. *Neuron* **82**, 1115-1128 (2014).
- 397 34 Chen, T.-W. *et al.* Ultrasensitive fluorescent proteins for imaging neuronal activity. *Nature* **499**,  
398 295-300 (2013).
- 399 35 Li, W., Kang, L., Piggott, B. J., Feng, Z. & Xu, X. S. The neural circuits and sensory channels  
400 mediating harsh touch sensation in *C. elegans*. *Nature communications* **2**, 315 (2011).
- 401 36 Crane, M. M., Chung, K., Stirman, J. & Lu, H. Microfluidics-enabled phenotyping, imaging, and  
402 screening of multicellular organisms. *Lab on a Chip* **10**, 1509-1517 (2010).
- 403 37 Leifer, A. M., Fang-Yen, C., Gershow, M., Alkema, M. J. & Samuel, A. D. Optogenetic  
404 manipulation of neural activity in freely moving *Caenorhabditis elegans*. *Nature methods* **8**, 147-  
405 152 (2011).
- 406 38 Stirman, J. N. *et al.* Real-time multimodal optical control of neurons and muscles in freely  
407 behaving *Caenorhabditis elegans*. *Nature methods* **8**, 153-158 (2011).
- 408 39 Hilliard, M. A., Bargmann, C. I. & Bazzicalupo, P. C. *elegans* responds to chemical repellents by  
409 integrating sensory inputs from the head and the tail. *Current Biology* **12**, 730-734 (2002).
- 410 40 White, J. G., Southgate, E., Thomson, J. N. & Brenner, S. The structure of the nervous system of  
411 the nematode *Caenorhabditis elegans*. *Philos Trans R Soc Lond B Biol Sci* **314**, 1-340 (1986).
- 412 41 Wicks, S. R. & Rankin, C. H. Integration of mechanosensory stimuli in *Caenorhabditis elegans*.  
413 *The Journal of neuroscience* **15**, 2434-2444 (1995).
- 414 42 Chung, K., Crane, M. M. & Lu, H. Automated on-chip rapid microscopy, phenotyping and sorting  
415 of *C. elegans*. *Nature methods* **5**, 637-643 (2008).
- 416 43 Crane, M. M., Chung, K. & Lu, H. Computer-enhanced high-throughput genetic screens of *C.*  
417 *elegans* in a microfluidic system. *Lab Chip* **9**, 38-40 (2009).
- 418 44 Gordus, A., Pokala, N., Levy, S., Flavell, S. W. & Bargmann, C. I. Feedback from network states  
419 generates variability in a probabilistic olfactory circuit. *Cell* **161**, 215-227 (2015).
- 420 45 Boyden, E. S., Zhang, F., Bamberg, E., Nagel, G. & Deisseroth, K. Millisecond-timescale,  
421 genetically targeted optical control of neural activity. *Nature neuroscience* **8**, 1263-1268 (2005).
- 422 46 Zhang, F. *et al.* Multimodal fast optical interrogation of neural circuitry. *Nature* **446**, 633-639  
423 (2007).
- 424 47 Airan, R. D., Thompson, K. R., Fenno, L. E., Bernstein, H. & Deisseroth, K. Temporally precise in  
425 vivo control of intracellular signalling. *Nature* **458**, 1025-1029 (2009).
- 426 48 Deisseroth, K. Optogenetics. *Nature Methods* **8**, 26-29, doi:10.1038/nmeth.f.324 (2011).

427 49 Larsch, J. *et al.* A Circuit for Gradient Climbing in *C. elegans* Chemotaxis. *Cell Rep* **12**, 1748-1760  
428 (2015).  
429 50 Brenner, S. The genetics of *Caenorhabditis elegans*. *Genetics* **77**, 71-94 (1974).  
430 51 Frøkjær-Jensen, C. *et al.* Single-copy insertion of transgenes in *Caenorhabditis elegans*. *Nature*  
431 *genetics* **40**, 1375-1383 (2008).  
432 52 del Campo, A. & Greiner, C. SU-8: a photoresist for high-aspect-ratio and 3D submicron  
433 lithography. *Journal of Micromechanics and Microengineering* **17**, R81 (2007).  
434 53 Unger, M. A., Chou, H.-P., Thorsen, T., Scherer, A. & Quake, S. R. Monolithic microfabricated  
435 valves and pumps by multilayer soft lithography. *Science* **288**, 113-116 (2000).  
436  
437



438 **Figure 1: Microfluidic platform can robustly deliver mechanical stimulus and allow**  
439 **imaging of calcium responses in *C. elegans* mechanoreceptor neurons.**

440 **a)** The device employs multiple sets of actuated structures: valves to trap animals in a  
441 reproducible position, and two sets of actuation valves used to deliver mechanical stimuli to the  
442 anterior and posterior regions of the body.

443 **b)** Sample frames from an activated neuron show changes in fluorescence due to mechanical  
444 stimulus. Because animals are not fully immobilized, and neurons of interest move during  
445 recordings due to the mechanical stimulus and behavioral responses, a tracking algorithm  
446 (Supplementary Fig. 3) was developed in order to automatically record the GCaMP and RFP  
447 intensities of traces from individual trials.

448 **c)** Timeline of on-chip mechano-stimulation and functional imaging of neurons. The loading and  
449 unloading of each worm requires only a few seconds. Each animal is given a waiting period to  
450 acclimate to the environment before being stimulated and imaged. Each trial is performed by  
451 recording video to track neuronal dynamic responses and applying mechanical stimuli.

452 **d)** Schematics of the mechanoreceptor neurons in this study: six gentle touch neurons -AVM,  
453 ALML/R, PVM, and PLML/R - and harsh touch PVDL/R neurons.

454 **e - j)** Responses of the *C. elegans* gentle touch and harsh touch neurons to mechanical stimuli.  
455 Average traces of GCaMP6 signals in **e)** ALM soma to 1s stimulus (n=16), **f)** ALM process to 2s  
456 stimulus (n=7), **g)** PVD soma (n=9, 55psi), **h)** PVM soma (n=17), **i)** PLM soma (n=9), and **j)**  
457 PVD process to 1s stimulus (n=5) at 45psi. Error bars represent SEM.

458 **k - m)** Gentle and harsh touch neurons exhibit reliable calcium responses when spatially resolved  
459 stimulus was delivered to the appropriate regions of animals in our system. **k)** The activity of  
460 AVM responses to 1s anterior but not posterior stimuli (anterior: n=10, posterior: n=5) at 45psi.

461 **l, m)** Gentle touch neuron, PVM, (2s stimulation, anterior: n=10, posterior: n=11) and harsh  
462 touch neuron, PVD, (2s stimulation, anterior: n=9, posterior: n=3) respond to both anterior and  
463 posterior stimuli at 45psi. Both neurons show the higher peak of neuronal responses to posterior  
464 stimuli than anterior stimuli. Error bars represent SEM. Orange denotes anterior touch and green  
465 denotes posterior touch.



466 For panels (e-m), arrow thickness indicates stimulation duration. 1s and 2s stimulations are  
467 represented by thin and thick arrows, respectively.

468

469 **Figure 2: The microfluidic platform delivers mechanical stimuli emulating both gentle and**  
470 **harsh touch by varying the magnitude of applied pressure and duration of the stimuli.**

471 **a - b)** Average traces of GCaMP6 signal in AVM neuron in response to diverse pressures and  
472 stimulus durations. **a)** Applied 1s stimulation with diverse pressures (25 psi: n=11, 35 psi: n=25,  
473 40 psi: n=8, 45 psi: n=27). **b)** Applied 40 psi stimulation with diverse stimulus durations (1s:  
474 n=8, 2s: n=10, 5s: n=10).

475 **c - d)** Maximum responses of calcium transients correlate with **c)** the applied pressure (2s  
476 stimulus, 35 to 45 psi) and **d)** the duration of stimuli (1 to 5s stimuli, 40 psi). Error bars represent  
477 SEM.

478 **e)** Average calcium responses of *mec-4(e1611)* mutants in AVM neuron to diverse pressures  
479 with 1s stimulus (25 psi: n=18, 35 psi: n=10, 40 psi: n=9, 45 psi: n=10).

480 **f)** Maximum responses of calcium responses of wild-type and *mec-4* mutant animals (Mann-  
481 Whitney Test, \* p<0.05, \*\* p<0.01, \*\*\* p<0.001, \*\*\*\* p<0.0001).

482 **g - h)** Average traces of GCaMP6 signal in PVD neuron in response to diverse pressures and  
483 stimulus durations. **g)** Applied 1s stimulation with diverse pressures (45 psi: n=9, 50 psi: n=6, 55  
484 psi: n=9). **h)** Applied 45 psi stimulation with diverse stimulus durations (1s: n=9, 2s: n=4, 5s:  
485 n=6).

486 **i)** Quantitative responses of AVM and PVD under different stimulation conditions. Both gentle  
487 touch AVM neurons and harsh touch sensing PVD neurons can be stimulated using this platform  
488 when using the right parameter regime. Each column refers to the applied pressure magnitude  
489 and each row refers to the applied durations of stimulation. For each data point, the circle size  
490 indicates the max response value from 0 to 3.0 and the rectangle size indicates response fraction  
491 from 0 to 1. Response fraction is defined as the percentage of traces that show a max response  
492 value of higher than 0.5.

493 **j-m)** Delivery of precisely repeated stimuli in AVM. **j, l)** When worms are exposed to 1s stimuli  
494 with short inter-stimulus intervals (1s), the neurons exhibited an incremental increase in response  
495 magnitude up to the second stimulus, and a reduced response in later stimuli (n=19). **k, m)** In  
496 contrast, when exposed to 2s stimuli with long inter-stimulus intervals (3 min), the response  
497 magnitude was reduced after each stimulus (n=10). Error bars represent SEM.

498

499 **Figure 3: The microfluidic platform enables screens to examine compounds that may affect**  
500 **neuronal responses to mechanical stimuli.**

501 **a)** Experimental procedure for the drug screen performed. Synchronized L1 worms are grown in  
502 NGM plates to the L4 stage and then deposited in a 48-well plate. Drug treated worms are  
503 cultured with 0.5 ml OP50 *E. coli* bacteria (OD 5) and 100 $\mu$ M drugs. Control worms are cultured  
504 with 0.5 ml OP50 *E. coli* bacteria (OD 5). Both groups of worms are incubated at 20°C for at  
505 least 24h. Subsequently, AVM responses to 1s stimulus were measured on-chip.

506 **b)** Three metrics measured from individual calcium dynamic traces: maximum response, delay  
507 time (time between the end of the stimulus and the arrival of maximum response), and half-life  
508 (time it takes the response to decay to half of the maximum).

509 **c)** Fraction of animal responses upon compound treatment. Several compounds produced a  
510 lowered fraction of responding animals, while a few slightly increased the response fraction.

511 **d - f)** Box plots show how compounds affect specific parameters of neuronal response upon  
512 mechanical stimulation. Quantification of each response was normalized to that of the control  
513 group from the same day (day 1 adult to day 3 adult). **d)** D-Lysine (#4), D-Alanine (#5), and D-  
514 Arginine (#8) were shown to reduce maximum response, **e)** D-Alanine (#5) and D-Arginine (#8)  
515 were shown to increase the time to peak, and **f)** D-Isoluecine (#3) was shown to decrease the  
516 decay half-life. In contrast,  $\beta$ -Alanine (#6) was shown to increase the half-life. (Kruskal-Wallis  
517 Test, \*  $p < 0.05$ , \*\*  $p < 0.01$ , \*\*\*  $p < 0.001$ , \*\*\*\*  $p < 0.0001$ )

518 **g - h)** Average traces of GCaMP6 in AVM neuron for drug treated worms that cause significant  
519 differences from untreated worms in responses to 1s mechanical stimulus. **g)** Day 1 adult worms  
520 (Control Day 1:  $n=53$ , D-Isoleucine:  $n=10$ , D-Lysine:  $n=10$ ), **h)** Day 2 adult worms (Control Day  
521 2:  $n=53$ , D-Alanine:  $n=15$ ,  $\beta$ -Alanine:  $n=14$ , D-Arginine:  $n=13$ ). Error bar represent SEM.

522

523 **Figure 4: Sensitization of the PVC interneuron responses.**

524 **a)** Simplified circuit diagram showing three sensory neurons connecting PVC to forward  
525 locomotion behavior (values and arrow thickness indicate number of synapses).

526 **b - c)** Responses of PVC interneuron to a single pulse of stimulation. Averages are plotted on the  
527 top graph. Error bars represent SEM. Bottom graphs represent individual traces. **c)** PVC calcium  
528 responses to 30s 0.1% SDS stimuli on tail (n=23). **d)** PVC calcium responses to 1s weak  
529 mechanical stimuli at 20 psi on posterior region (n=18). In individual traces for outliers, if the  
530 value of calcium transient is greater than 4 or less than 0, it would be equal to 4 or 0, respectively  
531 (bottom).

532 **d - e)** Sensitized PVC interneuron responses. **e)** Applying 5s 0.1% SDS stimuli enhances the  
533 responses of PVC interneuron to 1s weak mechanical stimuli at 20 psi (n=31). Averaged calcium  
534 responses (top) and individual traces (bottom) **f)** Applying 1s weak mechanical stimuli at 20 psi  
535 enhances the responses of PVC interneuron to 30s 0.1% SDS stimuli (n=24). Averaged calcium  
536 responses (top) and individual traces (bottom). Error bars represent SEM (top). In individual  
537 traces for outliers, if the value of calcium transient is greater than 4 or less than 0, it would be  
538 equal to 4 or 0, respectively (bottom).

539 **f)** Quantified maximum responses of calcium transients to either chemical (left column) or  
540 mechanical stimuli (right column). Data points in control groups represent maximum responses  
541 to either single chemical or mechanical stimuli. Sensitization of PVC interneuron responses is  
542 produced by applying prior weak mechanical stimuli at 20 psi or 5s 0.1% SDS chemical stimuli  
543 (Mann-Whitney Test, \* p<0.05, \*\* p<0.01).

544

545

546

547 **Supplementary Figure 1:** Overview of microfluidic device design and dimensions. The device  
548 is composed of the channel for worms (50-60  $\mu\text{m}$  deep and wide, which allow the animals to fit  
549 loosely inside), two sets of actuated membrane, and two sets of trapping valve. The width of the  
550 both of actuated PDMS membrane and trapping valve is 150  $\mu\text{m}$ , the distance between first and  
551 second sets of membrane is 200  $\mu\text{m}$  and second and third sets of membrane is 250  $\mu\text{m}$ .

552

553 **Supplementary Figure 2:** Displacement of the actuated membrane by applying pressure (n=4  
554 worms). It is important to note that the measurements were taken by images from transgenic  
555 worms expressing GFP along body-wall muscle (*stEx30[myo-3p::GFP + rol-6(su1006)]*). R-  
556 square value is 0.9814.

557

558 **Supplementary Figure 3:** Neuron Tracking Algorithm. In order to extract fluorescence  
559 intensities throughout recordings, a neuron tracking algorithm was developed. This was  
560 necessary because worms are not fully immobilized in the device, and mechanical stimuli often  
561 caused the neuron of interest to move within the field-of-view. **a)** Overall schematic of the  
562 neuron tracking algorithm. For each frame  $i$ , raw images are processed through a blob filter  
563 (Laplace of Gaussian filter) to improve contrast and facilitate segmentation. Blob filtered images  
564 are segmented by applying an empirically determined threshold. The neuron of interest is  
565 identified by the user in the first frame, and by distance to the neuron in the previous frame.  
566 Lastly, once the neuron is detected for each frame, intensity values are extracted (Green ROI,  
567 Red ROI, Green Background, and Red Background). **b)** Example of algorithm procedure.

568

569 **Supplementary Figure 4:** **a)** Average traces of GCaMP6 signal in AVM neuron in response to  
570 diverse pressures and stimulus durations (**i-iii**: 35 psi, **iv-vi**: 40 psi, **vii-ix**: 45 psi / **i, iv, vii**: 1s  
571 stimulus, **ii, v, viii**: 2s stimulus, **iii, vi, ix**: 5s stimulus, sample size **i**: n=25, **ii**: n=10, **iii**: n=8, **iv**:  
572 n=8, **v**: n=10, **vi**: n=10, **vii**: n=27, **viii**: n=6, **ix**: n=10). Error bars represent SEM. **b)** Average  
573 traces of GCaMP6 signal in PVD neuron in response to diverse pressures and stimulus durations  
574 (**i-iii**: 45 psi, **iv-vi**: 50 psi, **vii-ix**: 55 psi / **i, iv, vii**: 1s stimulus, **ii, v, viii**: 2s stimulus, **iii, vi, ix**: 5s

575 stimulus, sample size **i**: n=9, **ii**: n=4, **iii**: n=6, **iv**: n=6, **v**: n=9, **vi**: n=10, **vii**: n=9, **viii**: n=10, **ix**:  
576 n=10). Error bar represent SEM.

577

578 **Supplementary Figure 5:** AVM cell body responses to various stimuli with low pressures and  
579 durations **a**) 30 psi and 1 s (n=4), **b**) 30 psi and 0.2 s (n=10), **c**) 15 psi and 0.2 s (n=5). AVM  
580 response is reduced when using lower pressures (comparing a to Fig. 2a, and a to c). Response is  
581 also attenuated when using shorter durations (comparing a to b). Error bars represent SEM.

582

583 **Supplementary Figure 6:** PLM cell body responses to various stimulus durations (1s: n=9, 2s:  
584 n=4, 5s: n=4). Similar to those of AVM, maximum responses in PLM were proportional to the  
585 stimulus duration.

586

587 **Supplementary Figure 7:** AVM cell body response to delivery of repeated stimuli with long  
588 durations (5s, n=5). Similar to Figure 2l, traces showed incremental increases in the first few  
589 stimuli, and showed a decreased response in later stimuli.

590

591 **Supplementary Figure 8:** Individual (gray) and average traces (blue) for AVM response in  
592 untreated animals for different control groups for drug screen. **a**) Day 1 (n=53), **b**) Day 2 (n=53),  
593 **c**) Day 3 (n=35) adult worms.

594

595 **Supplementary Figure 9:** Average traces for AVM response in drug-treated animals that do not  
596 show a significant difference from the control groups. **a**) Day 1 adult worms (Control Day 1:  
597 n=53, D-Glutamic acid: n=10, D-Serine: n=12), **b**) Day 2 adult worms (Control Day 2: n=53,  $\gamma$ -  
598 D-Glutamylglycine: n=10, D-Asparagine: n=4), **c**) Day 3 adult worms (Control Day 3: n=35, 1,1'-  
599 Ethylidene-bis(L-tryptophan): n=10, D-Cysteine: n=10, D-Glutamine: n=11, D-Histidine: n=13).

600

601 **Supplementary Figure 10:** Overview of microfluidic device for the delivery of multimodal  
602 stimuli. The device is composed of a channel for worms (Inlet and Flush channel), two sets of

603 actuated membrane for mechanical stimuli (Touching valve 1,2), one set of trapping valve  
604 (Loading valve), two inlets for chemical stimuli (Buffer and Stimulus), and outlet.

605

606 **Supplementary Figure 11:** Average traces of GCaMP3 signal in ASH neuron in response to 30s  
607 0.1% SDS stimuli (n=13). Stimuli were delivered 30 s after recording baseline activity of  
608 neurons. Error bars represent SEM.

609

610 **Supplementary Figure 12: a)** Neural wiring diagram showing five sensory neurons in a circuit  
611 linking PVC to forward behavior, and the number of direct synapses between each pair of  
612 neurons (arrow thickness indicates number of synapses). **b-c)** The activity of PVC responses to  
613 localized strong mechanical stimuli: **b)** 1s anterior stimuli (n=5) and **c)** 1s posterior stimuli  
614 (n=18) at 45psi. **d)** Applying prior 5s 0.1% SDS stimuli enhances the responses of PVC  
615 interneuron to next 30s 0.1% SDS stimuli (n=13). **e)** The activity of PVC responses to buffer to  
616 buffer changes (n=10). Error bars represents SEM.

617

618

619 **Supplementary Table 1:** The 13 compounds of the orphan library were used for the drug screen  
620 (Fig. 3). Sample size is the total number of tested worms and if the value of maximum responses  
621 is larger than 0.5, it is counted as a responding worm.

622

623



624 **Supplementary Movie 1:** Calcium dynamics of AVM neuron to 1s anterior stimulation at 45psi.  
625 Stimulus was delivered 10s after recording baseline of neuronal activity. The transgenic animal  
626 shown here expresses GCaMP6 and RFP in AVM neuron (*ljIs142[mec-*  
627 *4::GCaMP6m::SL2TagRFP, unc-119] II; unc-119(ed3) III*). Left panel shows green  
628 fluorescence from GCaMP6m (left) and red fluorescence from RFP (right) in false colors. White  
629 boxes indicate location of AVM neuron and shows how algorithm tracks the neuron. Right graph  
630 shows the quantitative calcium trace and red circle indicates the current time point of video.  
631 Stimulus occurs at 10s (red dash line). 1x playback.

632

633 **Supplementary Movie 2:** Calcium dynamics of PLM neuron to 1s posterior stimulation at  
634 45psi. Stimulus was delivered 10s after recording baseline of neuronal activity. The transgenic  
635 animal shown here expresses GCaMP6 and RFP in PLM neuron (*ljIs142[mec-*  
636 *4::GCaMP6m::SL2TagRFP, unc-119] II; unc-119(ed3) III*). Left panel shows green  
637 fluorescence from GCaMP6m (left) and red fluorescence from RFP (right) in false colors. White  
638 boxes indicate location of PLM neuron and shows how algorithm tracks the neuron. Right graph  
639 shows the quantitative calcium trace and red circle indicates the current time point of video.  
640 Stimulus occurs at 10s (red dash line). 1x playback.

641

642 **Supplementary Movie 3:** Calcium dynamics of PVM neuron to 1s posterior stimulation at  
643 45psi. Stimulus was delivered 10s after recording baseline of neuronal activity. The transgenic  
644 animal shown here expresses GCaMP6 and RFP in PVM neuron (*ljIs142[mec-*  
645 *4::GCaMP6m::SL2TagRFP, unc-119] II; unc-119(ed3) III*). Left panel shows green  
646 fluorescence from GCaMP6m (left) and red fluorescence from RFP (right) in false colors. White  
647 boxes indicate location of PVM neuron and shows how algorithm tracks the neuron. Right graph  
648 shows the quantitative calcium trace and red circle indicates the current time point of video.  
649 Stimulus occurs at 10s (red dash line). 1x playback.

650

651 **Supplementary Movie 4:** Calcium dynamics of PVD neuron to 1s posterior stimulation at 45psi.  
652 Stimulus was delivered 10s after recording baseline of neuronal activity. The transgenic animal  
653 shown here expresses GCaMP6 in PVD neuron (*wyls5007[ser2prom3::GCaMP6, egl-*

654 *17::mCherry] X*). Left panel shows green fluorescence from GCaMP6 in false color. A white  
655 box indicates location of PVD neuron and shows how algorithm tracks the neuron. Right graph  
656 shows the quantitative calcium trace and red circle indicates the current time point of video.  
657 Stimulus occurs at 10s (red dash line). 5x playback.

658

659 **Supplementary Movie 5:** Calcium dynamics of PVC interneuron. Applying 5s 0.1% SDS  
660 chemical stimulus at 30s (red dash lines on the right panel) and then 1s weak mechanical stimuli  
661 at 65s (blue dash lines on the right panel). The transgenic animal shown here expresses GCaMP6  
662 in PVC interneuron (*aEx2[pglr-1::GCaMP6(s), punc-122::GFP]*). Left panel shows green  
663 fluorescence from GCaMP6 in false color. A white box indicates location of PVC interneuron  
664 and shows how algorithm tracks the neuron. Right graph shows the quantitative calcium trace  
665 and red circle indicates the current time point of video. Stimulus occurs at 10s (red dash line). 5x  
666 playback.

667

668 **Supplementary Movie 6:** Calcium dynamics of PVC interneuron. Applying 1s weak mechanical  
669 stimulus at 30s (blue dash lines on the right panel) and then 30s 0.1% SDS chemical stimulus at  
670 60s (red dash lines on the right panel). The transgenic animal shown here expresses GCaMP6 in  
671 PVC interneuron (*aEx2[pglr-1::GCaMP6(s), punc-122::GFP]*). Left panel shows green  
672 fluorescence from GCaMP6 in false color. A white box indicates location of PVC interneuron  
673 and shows how algorithm tracks the neuron. Right graph shows the quantitative calcium trace  
674 and red circle indicates the current time point of video. Stimulus occurs at 10s (red dash line). 5x  
675 playback.

676

677

## 678 **Methods References**

679

- 680 54 Brenner, S. The genetics of *Caenorhabditis elegans*. *Genetics* **77**, 71-94 (1974).  
681 55 Frøkjær-Jensen, C. *et al.* Single-copy insertion of transgenes in *Caenorhabditis elegans*. *Nature*  
682 *genetics* **40**, 1375-1383 (2008).  
683 56 del Campo, A. & Greiner, C. SU-8: a photoresist for high-aspect-ratio and 3D submicron  
684 lithography. *Journal of Micromechanics and Microengineering* **17**, R81 (2007).

685 57 Unger, M. A., Chou, H.-P., Thorsen, T., Scherer, A. & Quake, S. R. Monolithic microfabricated  
686 valves and pumps by multilayer soft lithography. *Science* **288**, 113-116 (2000).  
687

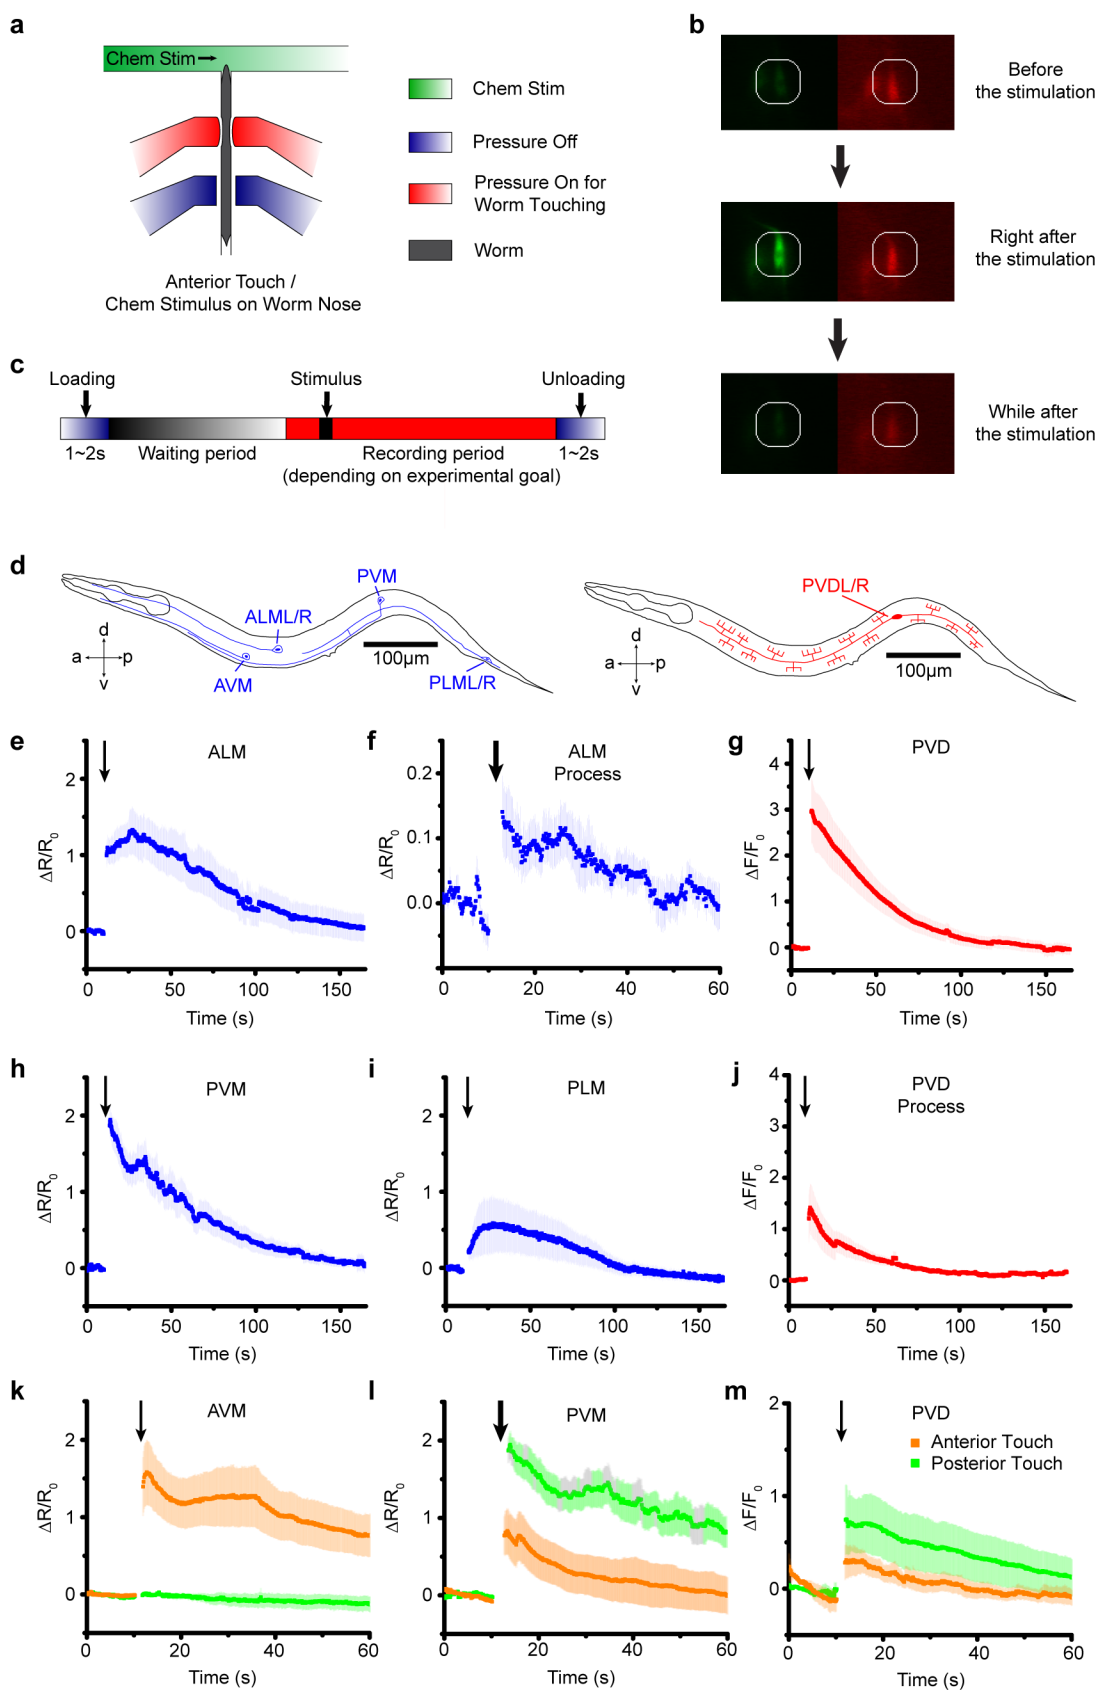

Cho et al., Figure 1.

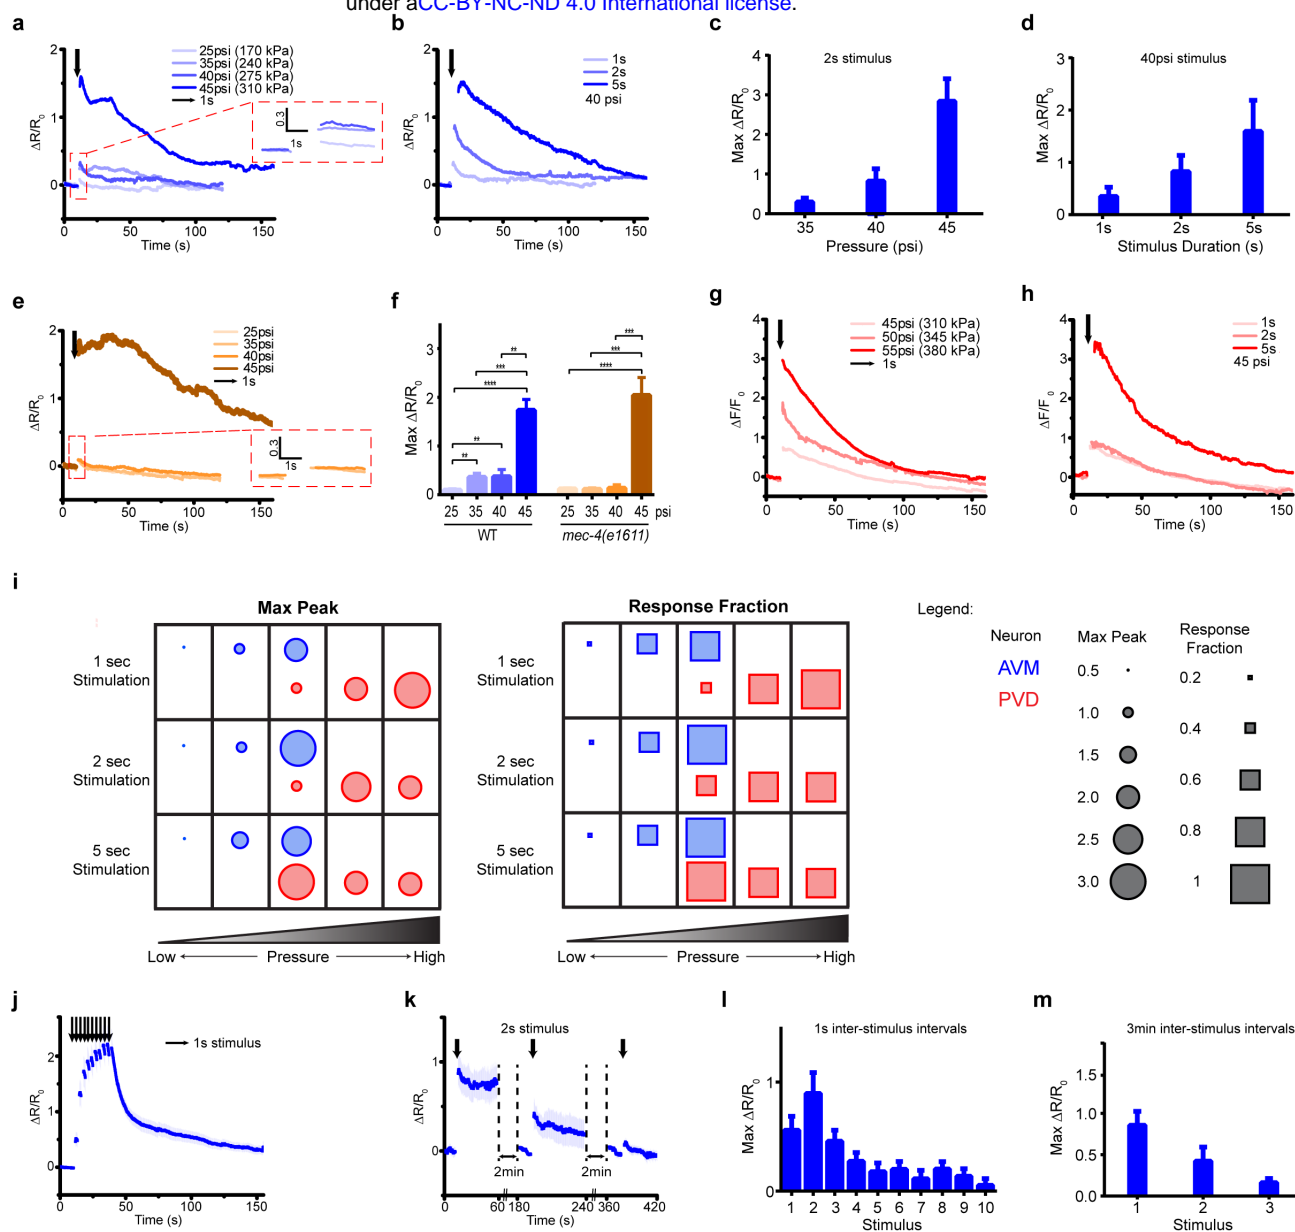

Cho et al., Figure 2.

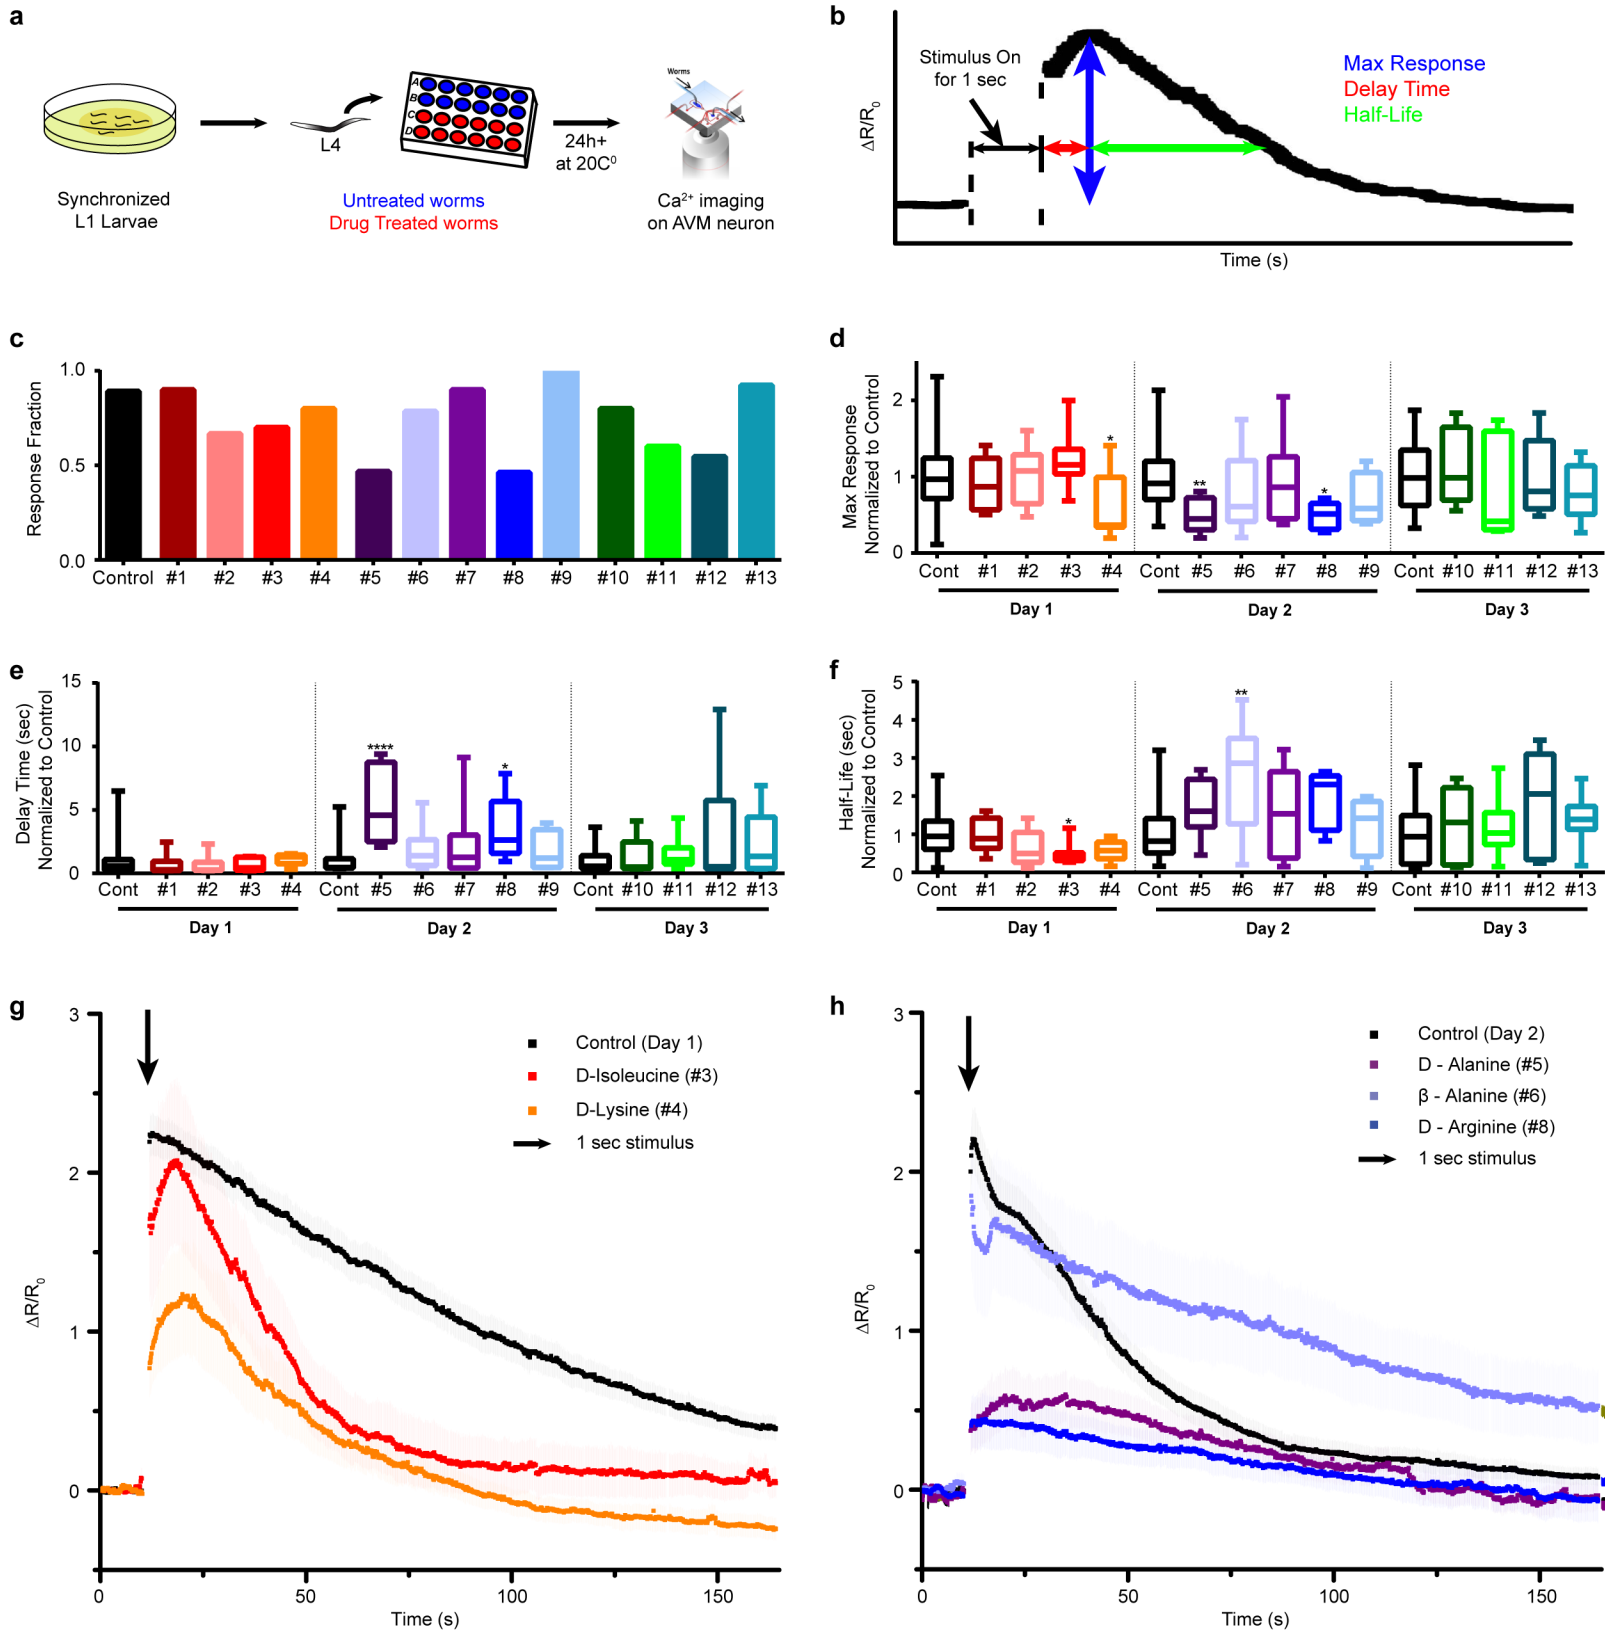

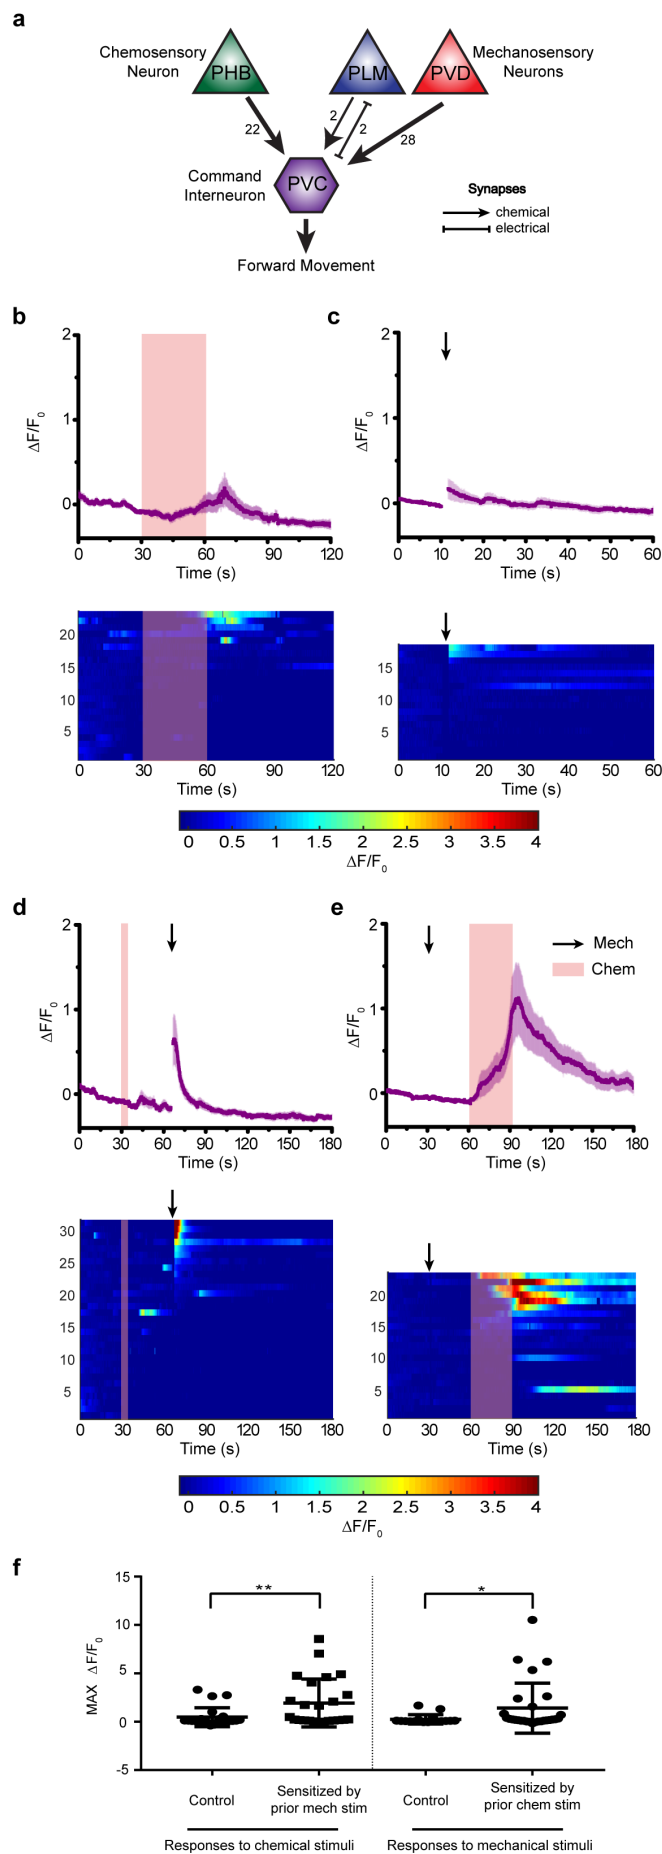

Cho et al., Figure 4.

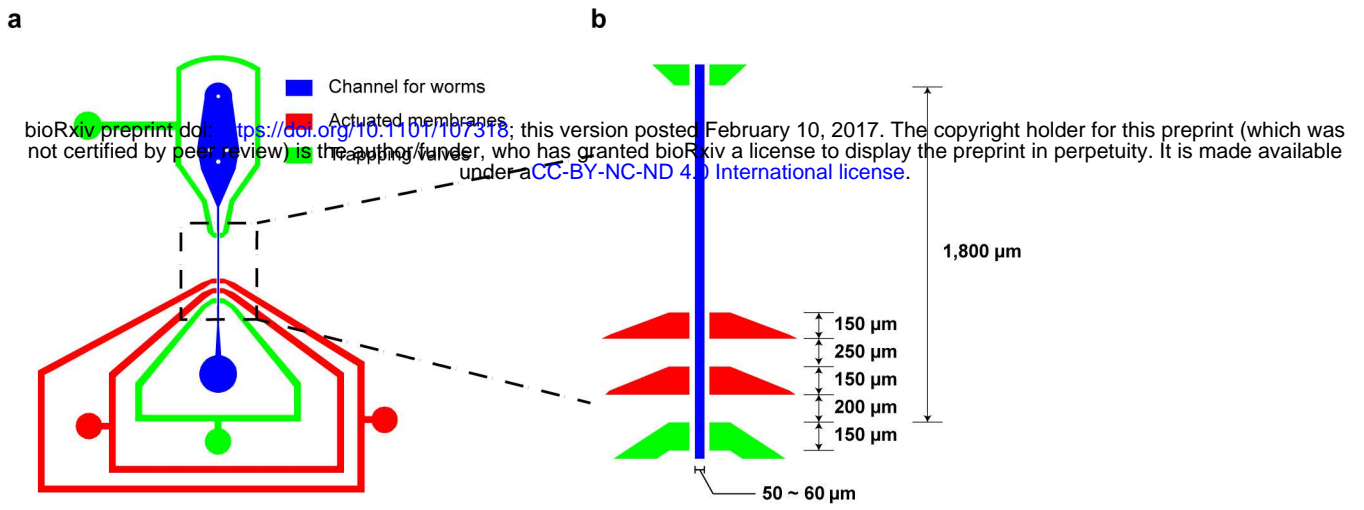

Cho et al., Supplementary Figure 1.



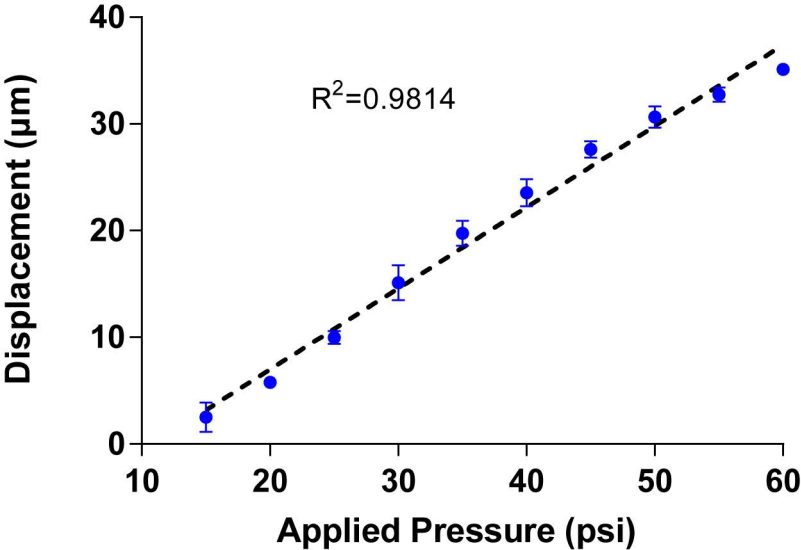

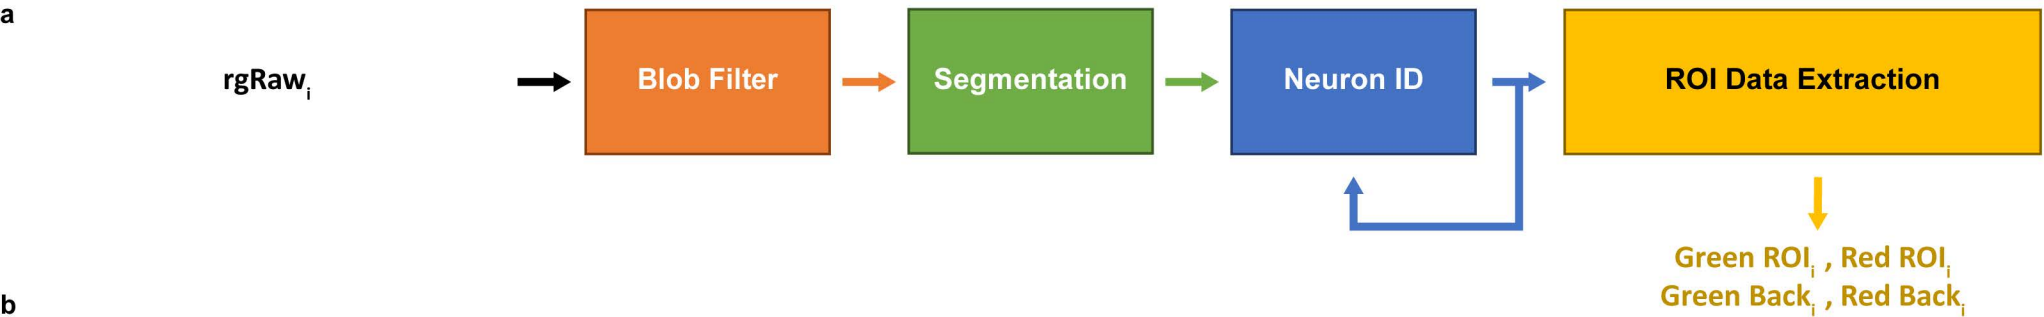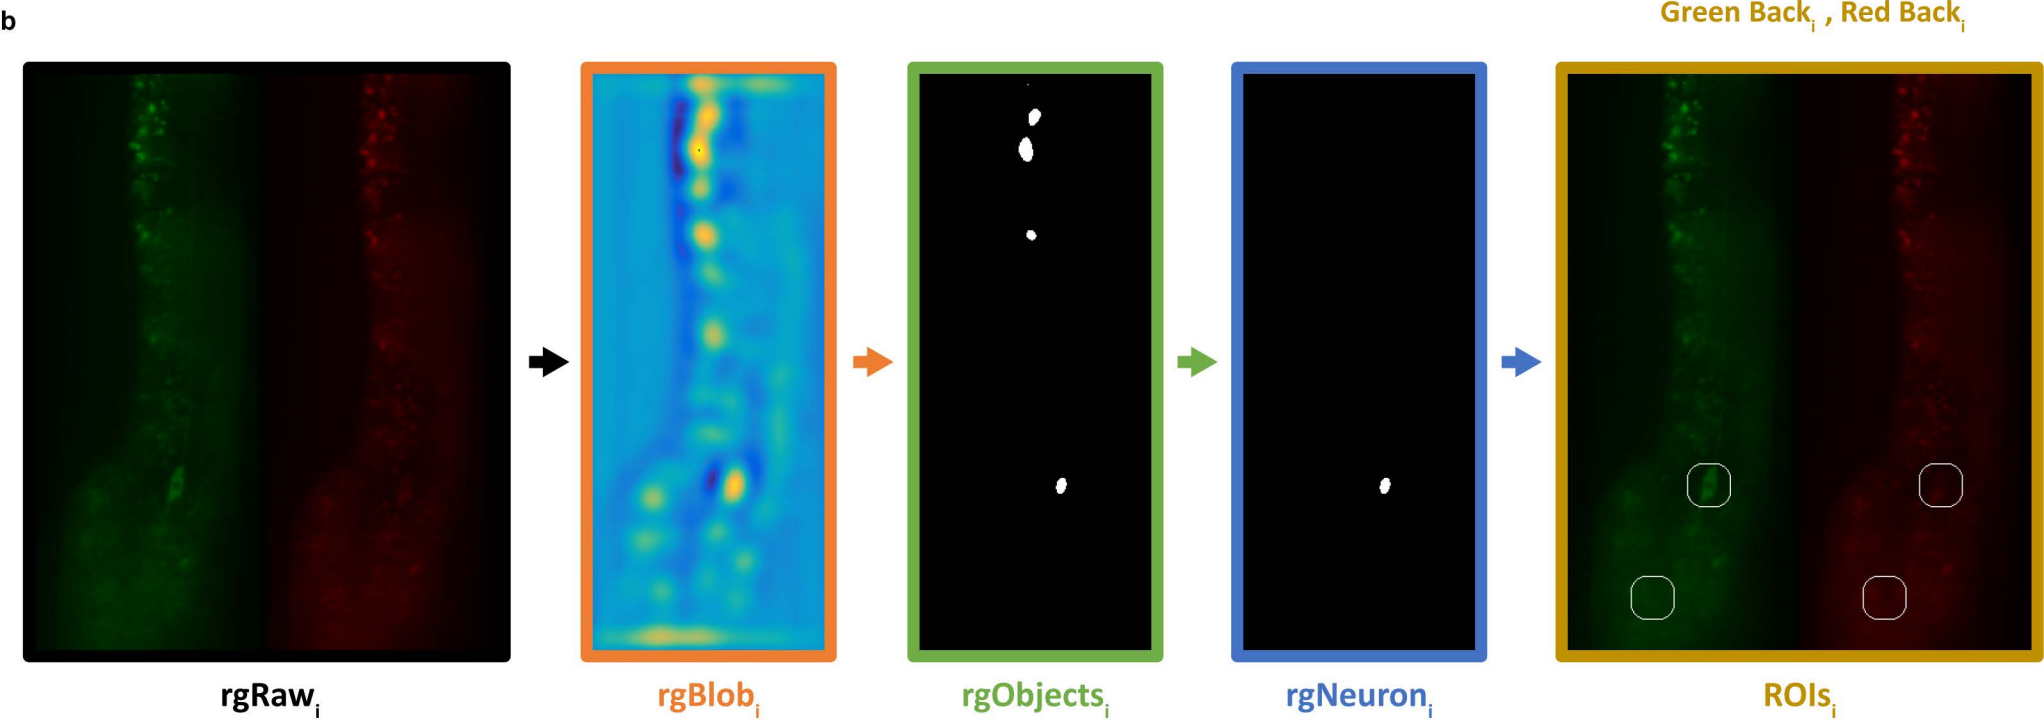



**a**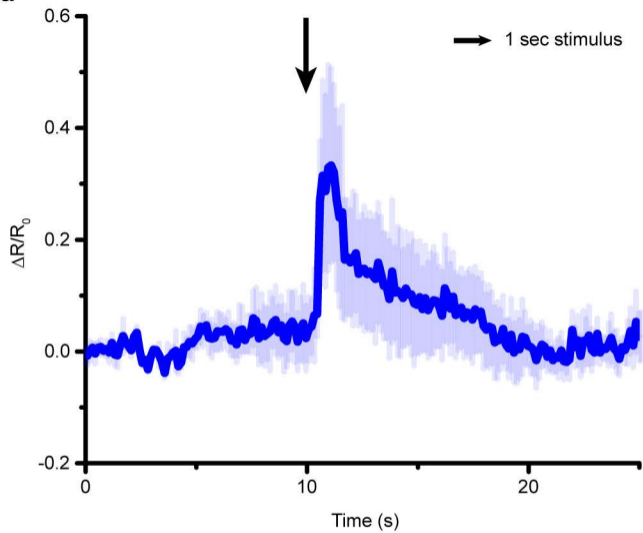**b**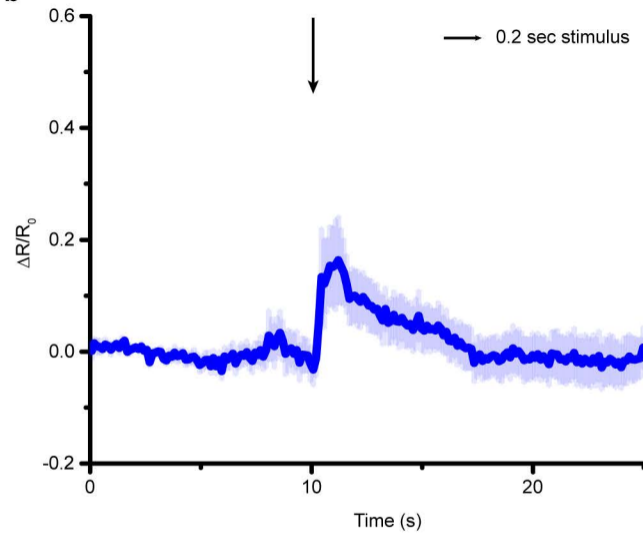**c**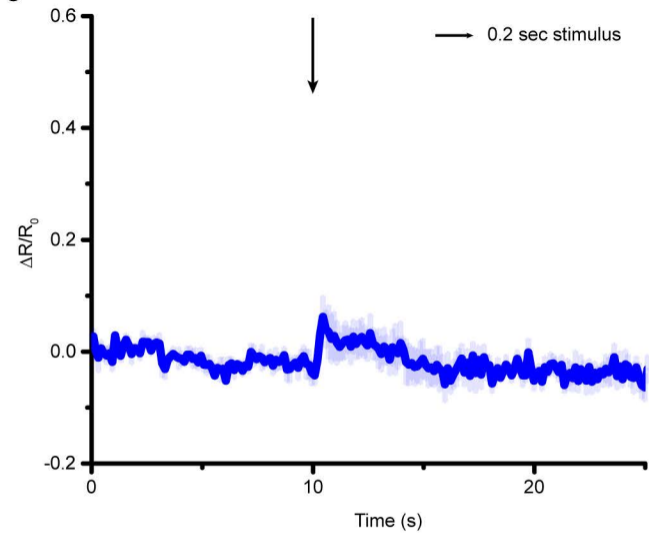

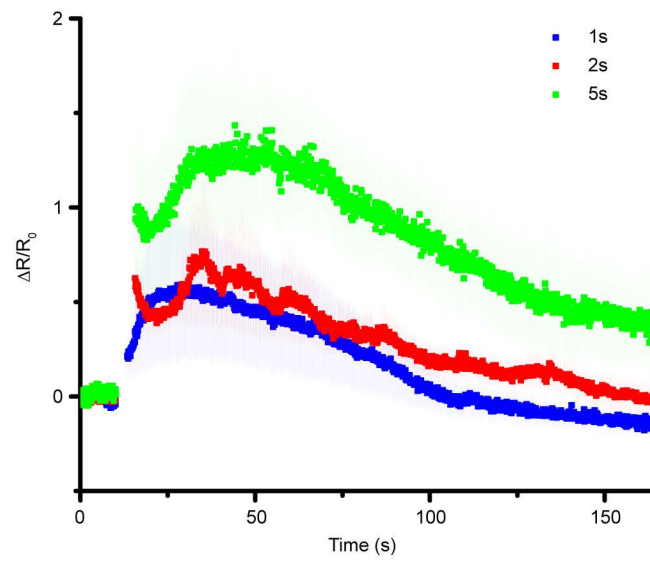

Cho et al., Supplementary Figure 6.

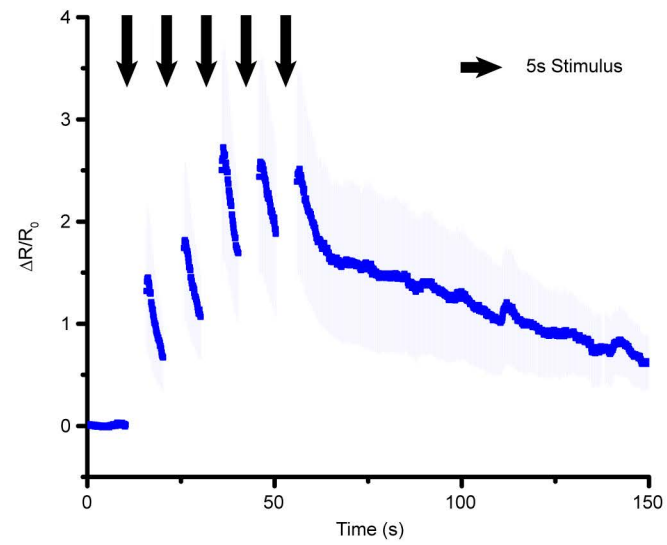

Cho et al., Supplementary Figure 7.

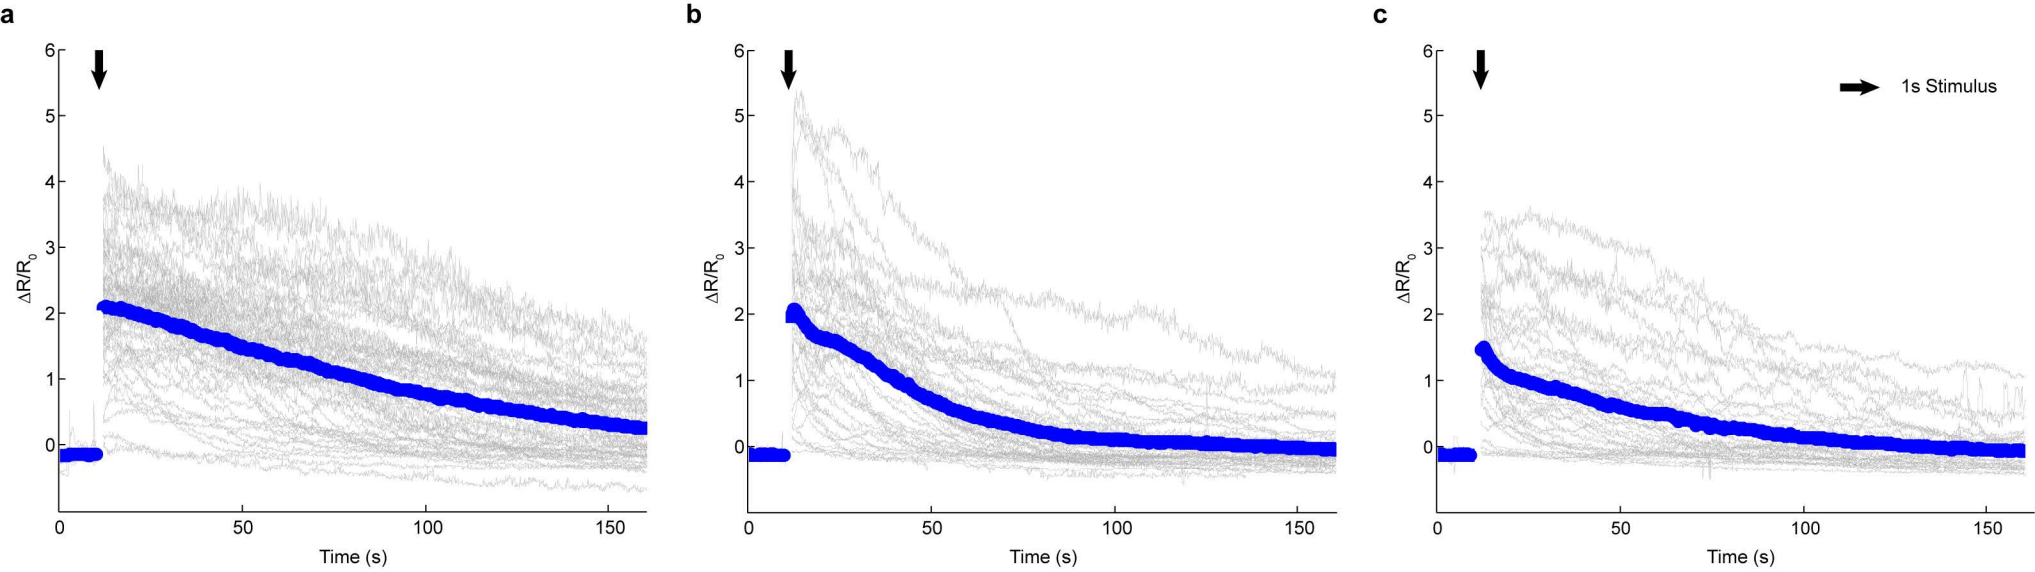

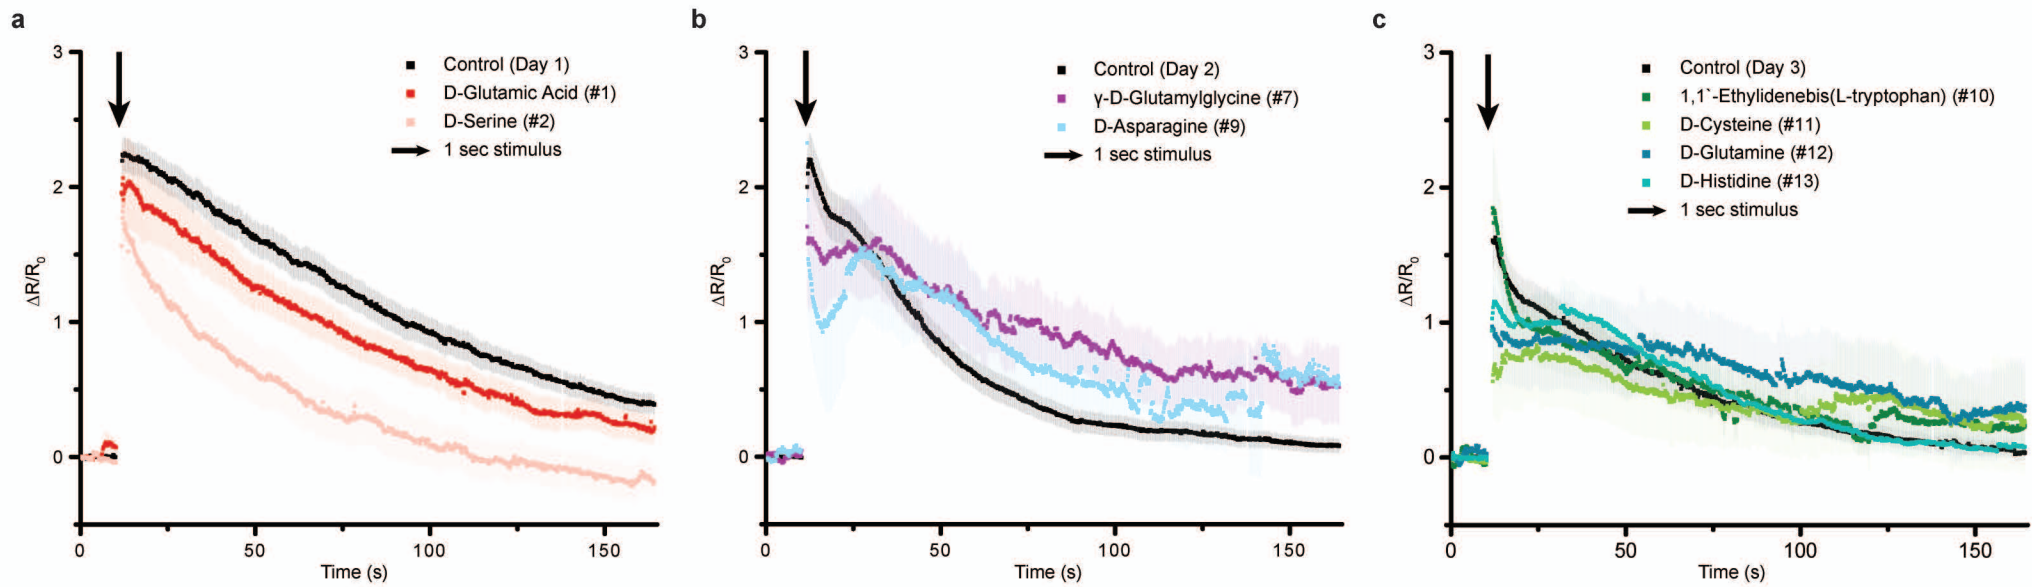

Cho et al., Supplementary Figure 9.



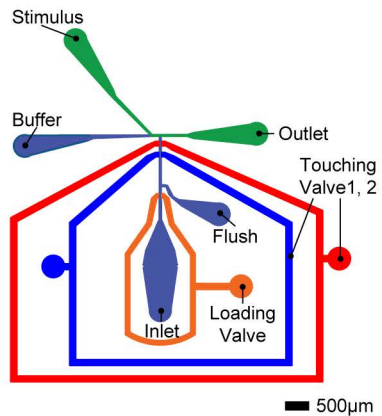

Cho et al., Supplementary Figure 10.

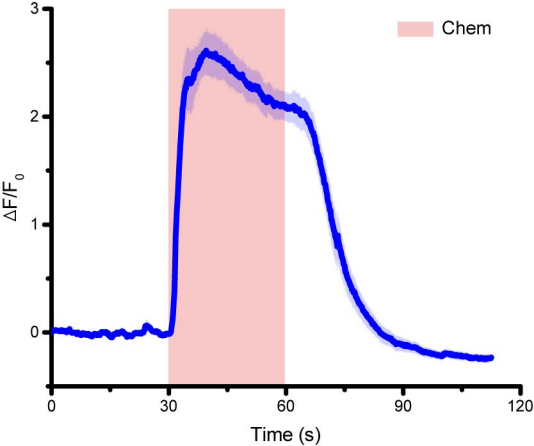

Cho et al., Supplementary Figure 11.

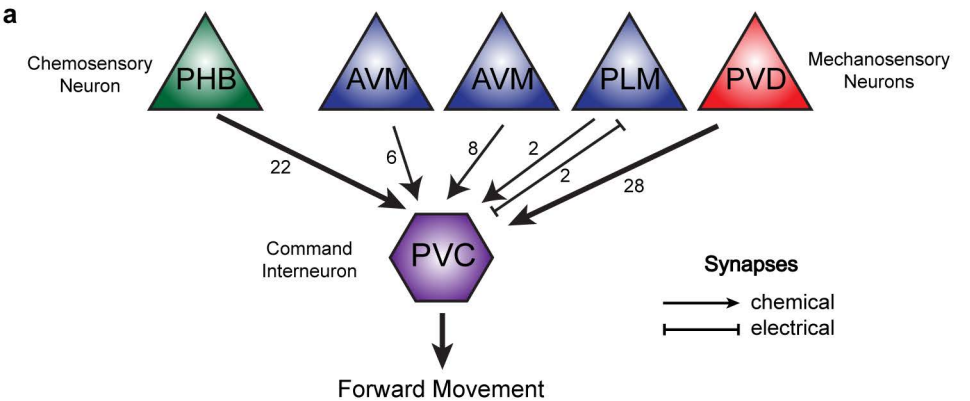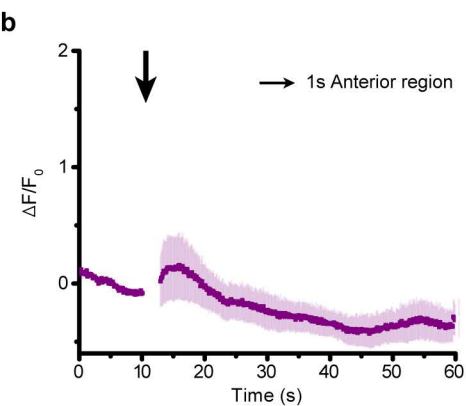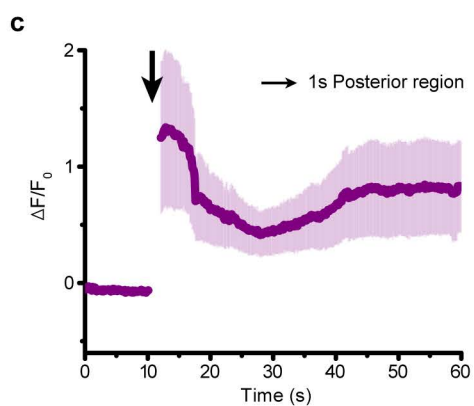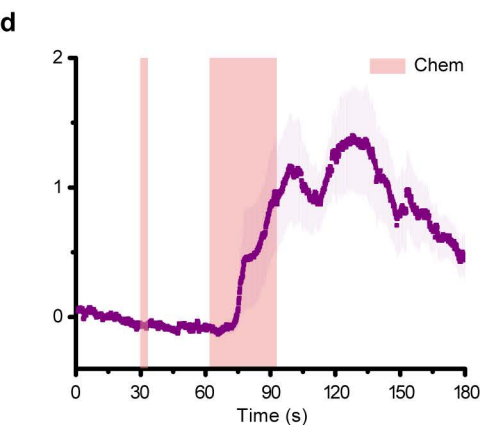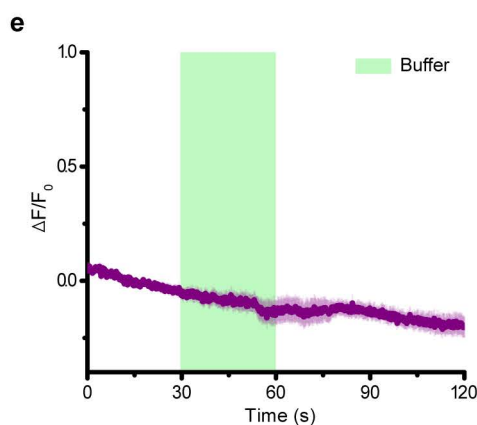

| <b>Number</b> | <b>Name</b>                       | <b>Rationale</b>                | <b>Sample size</b> | <b>Number of responding worms</b> |
|---------------|-----------------------------------|---------------------------------|--------------------|-----------------------------------|
| 1             | D-Glutamic acid                   | Putative endogenous ligand      | 10                 | 9                                 |
| 2             | D-Serine                          | Putative endogenous ligand      | 12                 | 8                                 |
| 3             | D-Isoleucine                      | D-Amino acid                    | 10                 | 7                                 |
| 4             | D-Lysine                          | D-Amino acid                    | 10                 | 8                                 |
| 5             | D-Alanine                         | D-Amino acid                    | 15                 | 7                                 |
| 6             | $\beta$ -Alanine                  | Endogenous                      | 14                 | 11                                |
| 7             | $\gamma$ -D-Glutamylglycine       | D-Amino acid                    | 10                 | 9                                 |
| 8             | D-Arginine                        | D-Amino acid                    | 13                 | 6                                 |
| 9             | D-Asparagine                      | D-Amino acid                    | 4                  | 4                                 |
| 10            | 1,1'-Ethylidene-bis(L-tryptophan) | Bioactive tryptophan derivative | 10                 | 8                                 |
| 11            | D-Cysteine                        | D-Amino acid                    | 10                 | 6                                 |
| 12            | D-Glutamine                       | D-Amino acid                    | 11                 | 6                                 |
| 13            | D-Histidine                       | D-Amino acid                    | 13                 | 12                                |

Cho et al., Supplementary Table 1.
